# Supplementary material for: Volatile Compound Abundance Correlations Provide a New Insight into Odor Balances in Sauce-Aroma Baijiu
Source: MDPI journal article supplement (doi:10.3390/foods11233916), 2022-12-05
Supplement: s1 [file s1]

**Supplementary Table S1.** Chemical standards and their quantification parameters.

| Compounds                   | RI <sub>Cal</sub> <sup>a</sup> | RI <sub>Lit</sub> <sup>b</sup> | LOD<br>(ug/L) | LOQ<br>(ug/L) | Recover<br>y (%) | R <sup>2</sup> | IS <sup>f</sup> |
|-----------------------------|--------------------------------|--------------------------------|---------------|---------------|------------------|----------------|-----------------|
| Acetaldehyde                | 692                            | 689 <sup>e</sup>               | 11            | 36.7          | 97               | 0.996          | IS1             |
| 1-Propanal                  | 801                            | 784 <sup>e</sup>               | 12.5          | 41.7          | 96               | 0.991          | IS1             |
| Ethyl formate               | 814                            | 813 <sup>d</sup>               | 128.9         | 429.7         | 98               | 0.996          | IS3             |
| 1,1-Diethoxymethane         | 829                            | 826 <sup>d</sup>               | 76.1          | 253.7         | 101              | 0.992          | IS1             |
| Acetone                     | 835                            | 813 <sup>e</sup>               | 43            | 143.3         | 93               | 0.993          | IS1             |
| Isobutyraldehyde            | 855                            | 855 <sup>e</sup>               | 54.2          | 180.7         | 101              | 0.992          | IS1             |
| 1,1-Diethoxyethane          | 878                            | 871 <sup>d</sup>               | 284           | 946.7         | 94               | 0.99           | IS1             |
| 2-Butanone                  | 892                            | 894 <sup>e</sup>               | 18.9          | 63.0          | 96               | 0.996          | IS1             |
| Ethyl acetate               | 896                            | 876 <sup>d</sup>               | 45.4          | 151.3         | 101              | 0.996          | IS3             |
| Methanol                    | 904                            | 910 <sup>e</sup>               | 97.2          | 324.0         | 99               | 0.998          | IS1             |
| 2-Methylbutyraldehyde       | 916                            | 916 <sup>e</sup>               | 24.9          | 83.0          | 93               | 0.996          | IS1             |
| Ethyl propanoate            | 928                            | 928 <sup>c</sup>               | 21.9          | 73.0          | 100              | 0.998          | IS3             |
| 3-Methylbutyraldehyde       | 935                            | 932 <sup>e</sup>               | 44.5          | 148.3         | 92               | 0.996          | IS1             |
| Ethyl isobutyrate           | 960                            | 960 <sup>e</sup>               | 44.9          | 149.7         | 98               | 0.994          | IS3             |
| Propyl acetate              | 973                            | 977 <sup>e</sup>               | 54.2          | 180.7         | 100              | 0.997          | IS3             |
| 2-Pentanone                 | 996                            | 996 <sup>e</sup>               | 32.1          | 107.0         | 89               | 0.991          | IS1             |
| Ethyl butyrate              | 1021                           | 1023 <sup>c</sup>              | 37.4          | 124.7         | 101              | 0.994          | IS3             |
| 2-Butanol                   | 1027                           | 1016 <sup>d</sup>              | 32.4          | 108.0         | 93               | 0.999          | IS1             |
| 1-Propanol                  | 1035                           | 1032 <sup>d</sup>              | 18.1          | 60.3          | 87               | 0.991          | IS1             |
| 1,1-Diethoxy-3-methylbutane | 1068                           | 1068 <sup>c</sup>              | 21.6          | 72.0          | 92               | 0.995          | IS3             |
| Ethyl isovalerate           | 1071                           | 1072 <sup>e</sup>              | 329           | 1096.7        | 103              | 0.995          | IS1             |
| 1,1-Diethoxy-2-methylbutane | 1079                           | 1079 <sup>e</sup>              | 69.2          | 230.7         | 98               | 0.992          | IS1             |
| Isobutanol                  | 1092                           | 1093 <sup>e</sup>              | 60.4          | 201.3         | 101              | 0.992          | IS1             |
| 2-Pentanol                  | 1112                           | 1118 <sup>d</sup>              | 13            | 43.3          | 104              | 0.991          | IS1             |
| Isoamyl acetate             | 1122                           | 1126 <sup>e</sup>              | 65.9          | 219.7         | 99               | 0.998          | IS3             |
| Ethyl valerate              | 1132                           | 1139 <sup>e</sup>              | 51            | 170.0         | 100              | 0.998          | IS3             |
| 1-Butanol                   | 1139                           | 1139 <sup>c</sup>              | 17.4          | 58.0          | 91               | 0.998          | IS1             |
| 2-Methyl butanol            | 1204                           | 1203 <sup>c</sup>              | 8.8           | 29.3          | 87               | 0.993          | IS3             |
| 3-Methyl butanol            | 1209                           | 1209 <sup>c</sup>              | 21.6          | 72.0          | 102              | 0.996          | IS1             |
| Ethyl hexanoate             | 1239                           | 1239 <sup>c</sup>              | 3.81          | 12.7          | 103              | 0.999          | IS3             |
| 1-Pentanol                  | 1255                           | 1255 <sup>e</sup>              | 74.2          | 247.3         | 100              | 0.992          | IS1             |
| 3-Hydroxy-2-butanone        | 1291                           | 1292 <sup>e</sup>              | 231.1         | 770.3         | 95               | 0.993          | IS3             |
| Hexanol                     | 1350                           | 1353 <sup>e</sup>              | 26.8          | 89.3          | 94               | 0.998          | IS1             |
| Ethyl heptanoate            | 1357                           | 1357 <sup>c</sup>              | 26.5          | 88.3          | 106              | 0.999          | IS3             |
| Ethyl lactate               | 1359                           | 1359 <sup>c</sup>              | 67.1          | 223.7         | 93               | 0.993          | IS3             |
| Butyl caproate              | 1427                           | 1427 <sup>e</sup>              | 7.7           | 25.7          | 90               | 0.995          | IS3             |
| Acetic acid                 | 1435                           | 1438 <sup>c</sup>              | 73            | 243.3         | 97               | 0.998          | IS2             |

|                            |      |                   |       |        |     |       |     |
|----------------------------|------|-------------------|-------|--------|-----|-------|-----|
| Ethyl octanoate            | 1440 | 1439 <sup>c</sup> | 13.2  | 44.0   | 104 | 0.998 | IS2 |
| Furfural                   | 1471 | 1441 <sup>d</sup> | 86.3  | 287.7  | 100 | 0.999 | IS2 |
| Benzaldehyde               | 1502 | 1502 <sup>d</sup> | 27.3  | 91.0   | 91  | 0.993 | IS2 |
| Propionic acid             | 1528 | 1530 <sup>c</sup> | 145   | 483.3  | 98  | 0.999 | IS2 |
| Ethyl nonanoate            | 1531 | 1530 <sup>e</sup> | 12.5  | 41.7   | 108 | 0.998 | IS2 |
| Meso-2,3-butanediol        | 1536 | 1538 <sup>e</sup> | 792   | 2640.0 | 86  | 0.996 | IS2 |
| (2R,3R)-(-)-2,3-Butanediol | 1545 | 1545 <sup>e</sup> | 179.2 | 597.3  | 94  | 0.991 | IS2 |
| Isobutyric acid            | 1562 | 1564 <sup>e</sup> | 16.3  | 54.3   | 104 | 0.993 | IS2 |
| Hexyl hexanoate            | 1609 | 1609 <sup>c</sup> | 9.92  | 33.1   | 98  | 0.998 | IS2 |
| Butyric acid               | 1615 | 1614 <sup>c</sup> | 28.4  | 94.7   | 77  | 0.992 | IS2 |
| Ethyl decanoate            | 1644 | 1648 <sup>e</sup> | 48.5  | 161.7  | 92  | 0.995 | IS2 |
| Isovaleric acid            | 1652 | 1647 <sup>e</sup> | 11.6  | 38.7   | 105 | 0.998 | IS2 |
| Furfuryl alcohol           | 1665 | 1665 <sup>e</sup> | 89.6  | 298.7  | 92  | 0.993 | IS2 |
| Valeric acid               | 1725 | 1720 <sup>e</sup> | 33.8  | 112.7  | 99  | 0.992 | IS2 |
| Ethyl phenylacetate        | 1782 | 1782 <sup>c</sup> | 5.17  | 17.2   | 103 | 0.991 | IS2 |
| Ethyl laurate              | 1841 | 1840 <sup>c</sup> | 32.5  | 108.3  | 105 | 0.997 | IS2 |
| Hexanoic acid              | 1849 | 1844 <sup>c</sup> | 26.3  | 87.7   | 76  | 0.998 | IS2 |
| Benzyl alcohol             | 1868 | 1866 <sup>e</sup> | 5.9   | 19.7   | 86  | 0.992 | IS2 |
| Ethyl 3-phenylpropanoate   | 1884 | 1884 <sup>c</sup> | 12.8  | 42.7   | 101 | 0.994 | IS2 |
| 2-Phenylethanol            | 1920 | 1899 <sup>d</sup> | 18    | 60.0   | 92  | 0.994 | IS2 |
| Heptanoic acid             | 1953 | 1953 <sup>e</sup> | 37.9  | 126.3  | 95  | 0.993 | IS2 |
| Ethyl myristate            | 2049 | 2070 <sup>e</sup> | 35.3  | 117.7  | 103 | 0.992 | IS2 |
| Octanoic acid              | 2055 | 2055 <sup>c</sup> | 475   | 1583.3 | 89  | 0.997 | IS2 |
| Nonanoic acid              | 2162 | 2162 <sup>c</sup> | 208   | 693.3  | 97  | 0.998 | IS2 |
| Ethyl hexadecenoate        | 2251 | 2251 <sup>c</sup> | 116   | 386.7  | 103 | 0.999 | IS2 |
| Ethyl palmitate            | 2258 | 2251 <sup>c</sup> | 58.1  | 193.7  | 102 | 0.993 | IS2 |
| Ethyl oleate               | 2479 | 2479 <sup>c</sup> | 222   | 740.0  | 94  | 0.996 | IS2 |
| Ethyl linoleate            | 2525 | 2530 <sup>e</sup> | 56.8  | 189.3  | 76  | 0.991 | IS2 |

<sup>a</sup> RI<sub>Cal</sub>, linear retention index calculated.

<sup>b</sup> RI<sub>Lit</sub>, Reference linear retention index from literature.

<sup>c</sup> Zhao, D., Shi, D., Sun, J., Li, A., Sun, B., Zhao, M., ... & Zheng, F. (2018). Characterization of key aroma compounds in Gujinggong Chinese Baijiu by gas chromatography–olfactometry, quantitative measurements, and sensory evaluation. *Food Research International*, 105, 616-627.

<sup>d</sup> Pino, J. A., Tolle, S., Gök, R., & Winterhalter, P. (2012). Characterisation of odour-active compounds in aged rum. *Food chemistry*, 132(3), 1436-1441.

<sup>e</sup> Standard Reference Data Act. (2021), *NIST Chemistry WebBook*, SRD 69, Retrieved from <https://webbook.nist.gov/chemistry/>

<sup>f</sup> Corresponding internal standard (IS) of aroma compounds. IS1: Amyl acetate; IS2: 2-methyl hexanoic acid; IS3: tertiary amyl alcohol.
