# Supplementary material for: Volatile Compound Abundance Correlations Provide a New Insight into Odor Balances in Sauce-Aroma Baijiu
Source: Foods. 2022 Dec 5;11(23):3916. doi: 10.3390/foods11233916 (PMC9739518; doi:10.3390/foods11233916)
Supplement: Supplementary file 1 [file foods-11-03916-s001.zip]

Archive with 6 entries (6 files):
- Supplementary Figure S1.pdf
- Supplementary Figure S2.pdf
- Supplementary Figure S3.pdf
- Supplementary Figure S4.pdf
- Supplementary File S1.pdf
- Supplementary Table S1.pdf
