# Supplementary figures and images for: Volatile Compound Abundance Correlations Provide a New Insight into Odor Balances in Sauce-Aroma Baijiu
Source: MDPI journal article supplement (doi:10.3390/foods11233916), 2022-12-05

**A**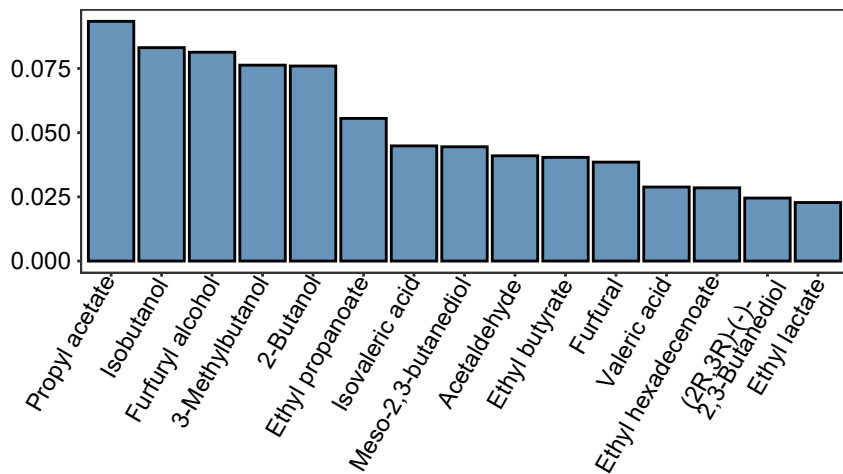**B**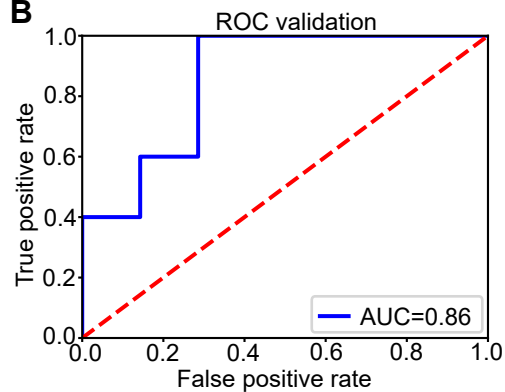**C**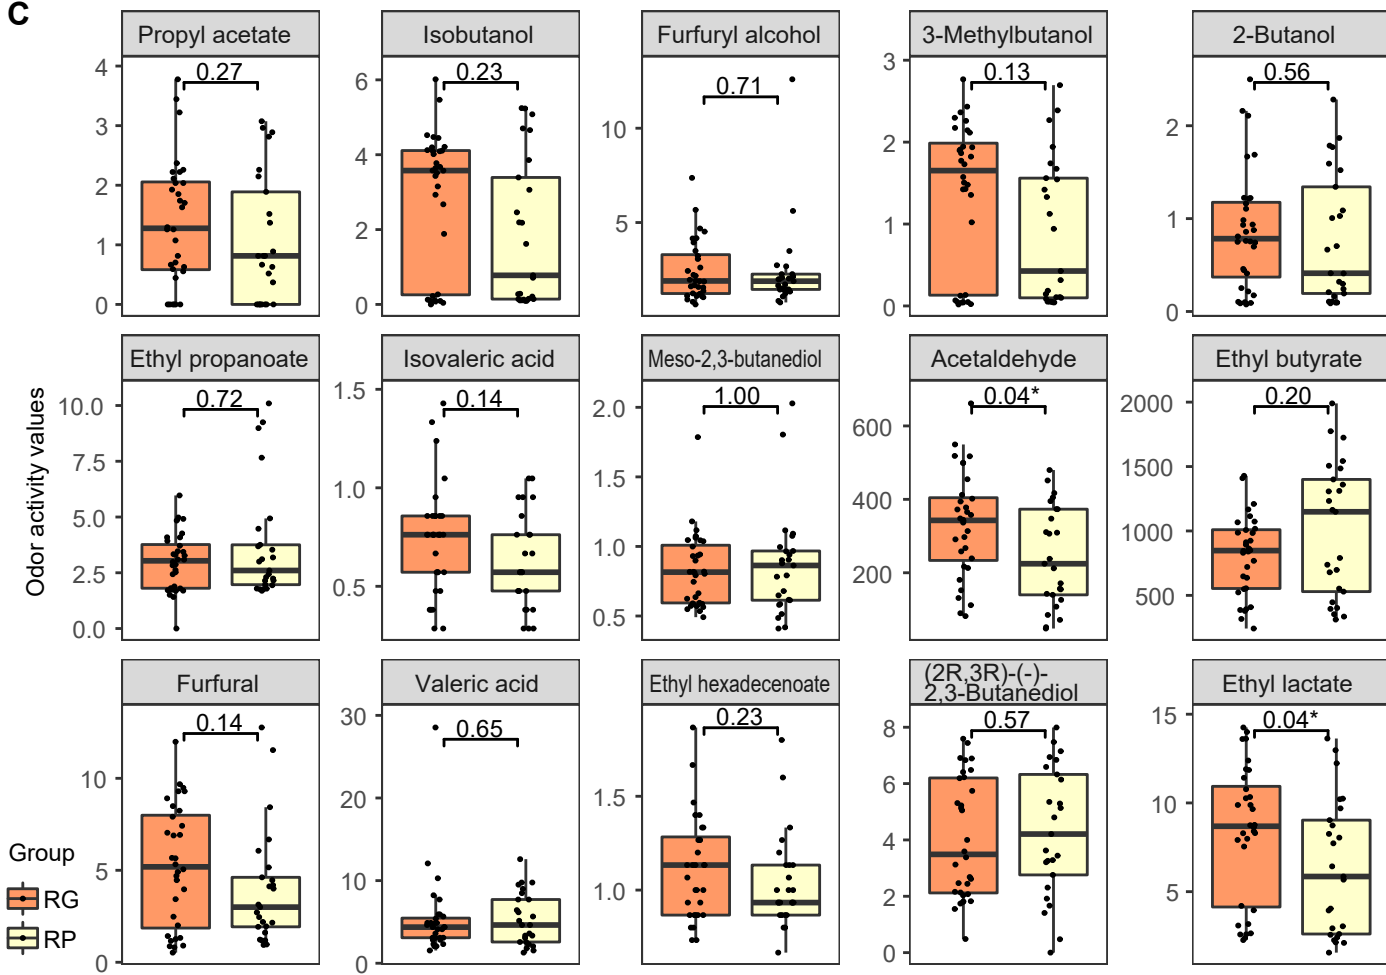

Supplement: s1 [file s1]

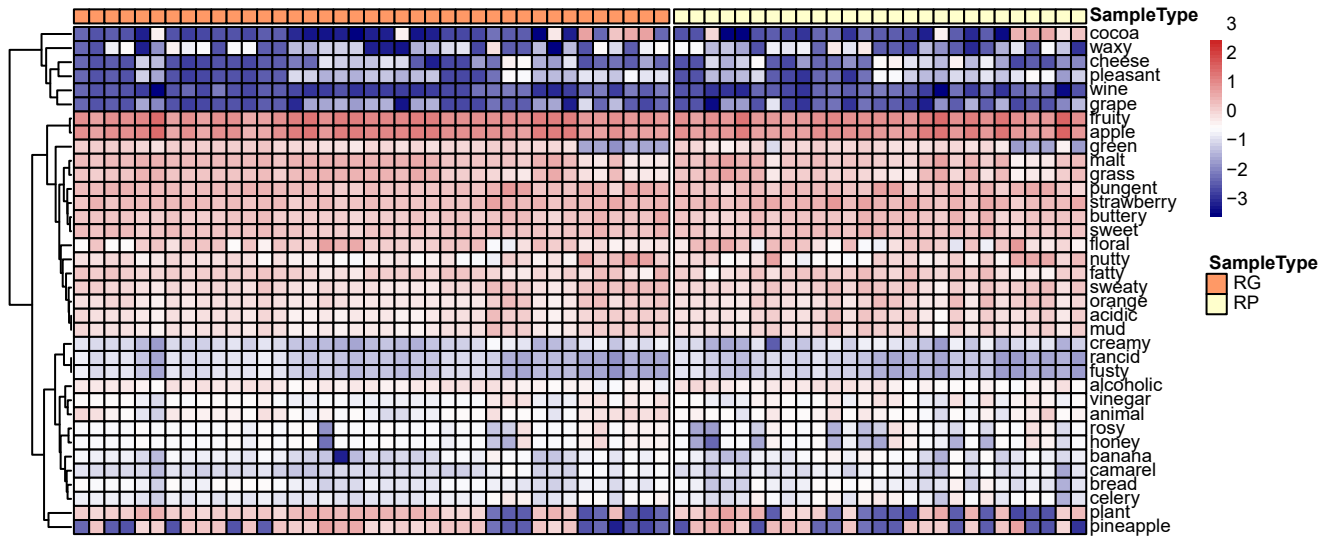

Supplement: s1 [file s1]

**A**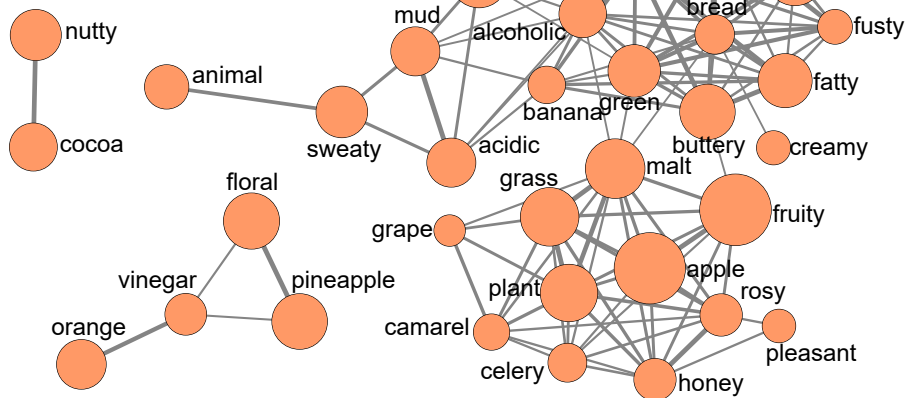**B**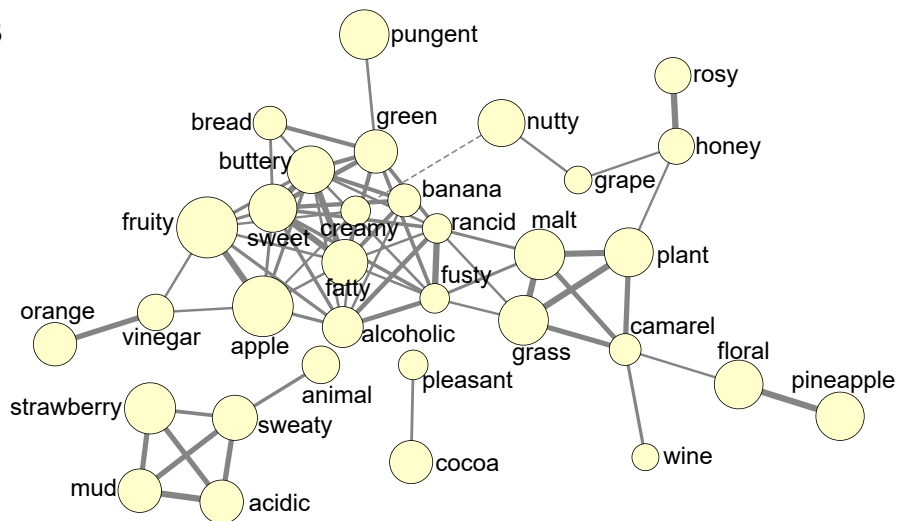

Supplement: s1 [file s1]

**A**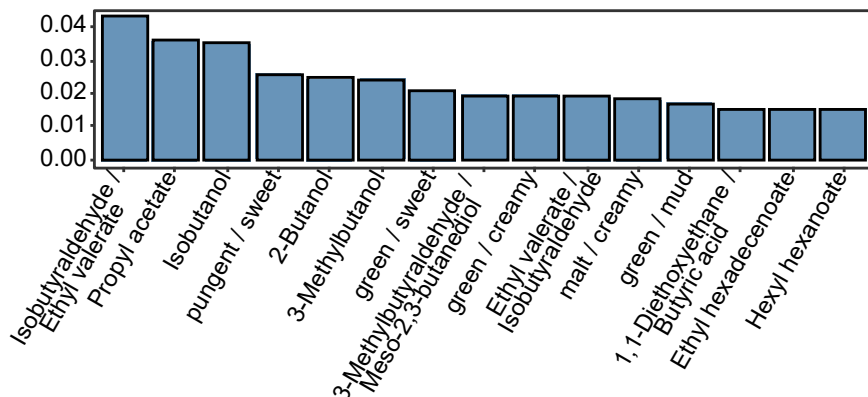**B**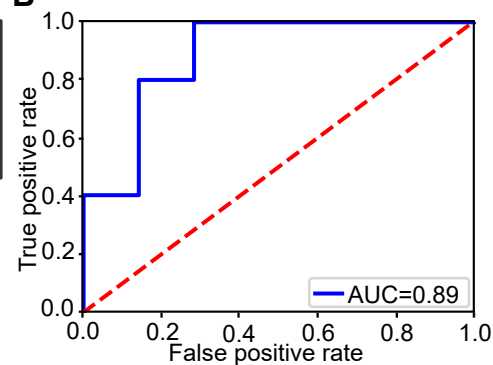**C**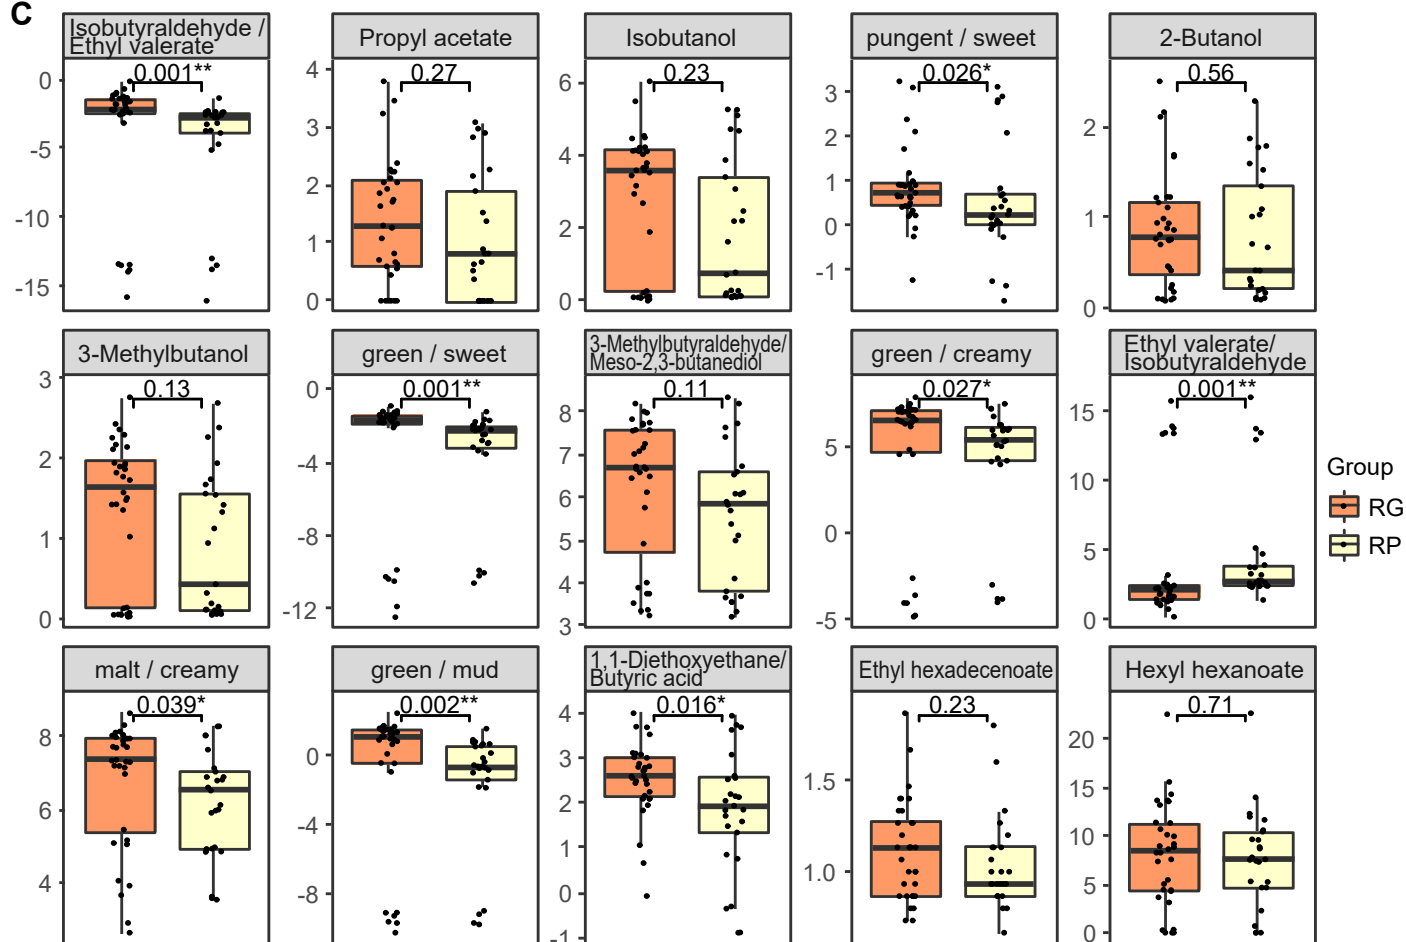

Supplement: s1 [file s1]

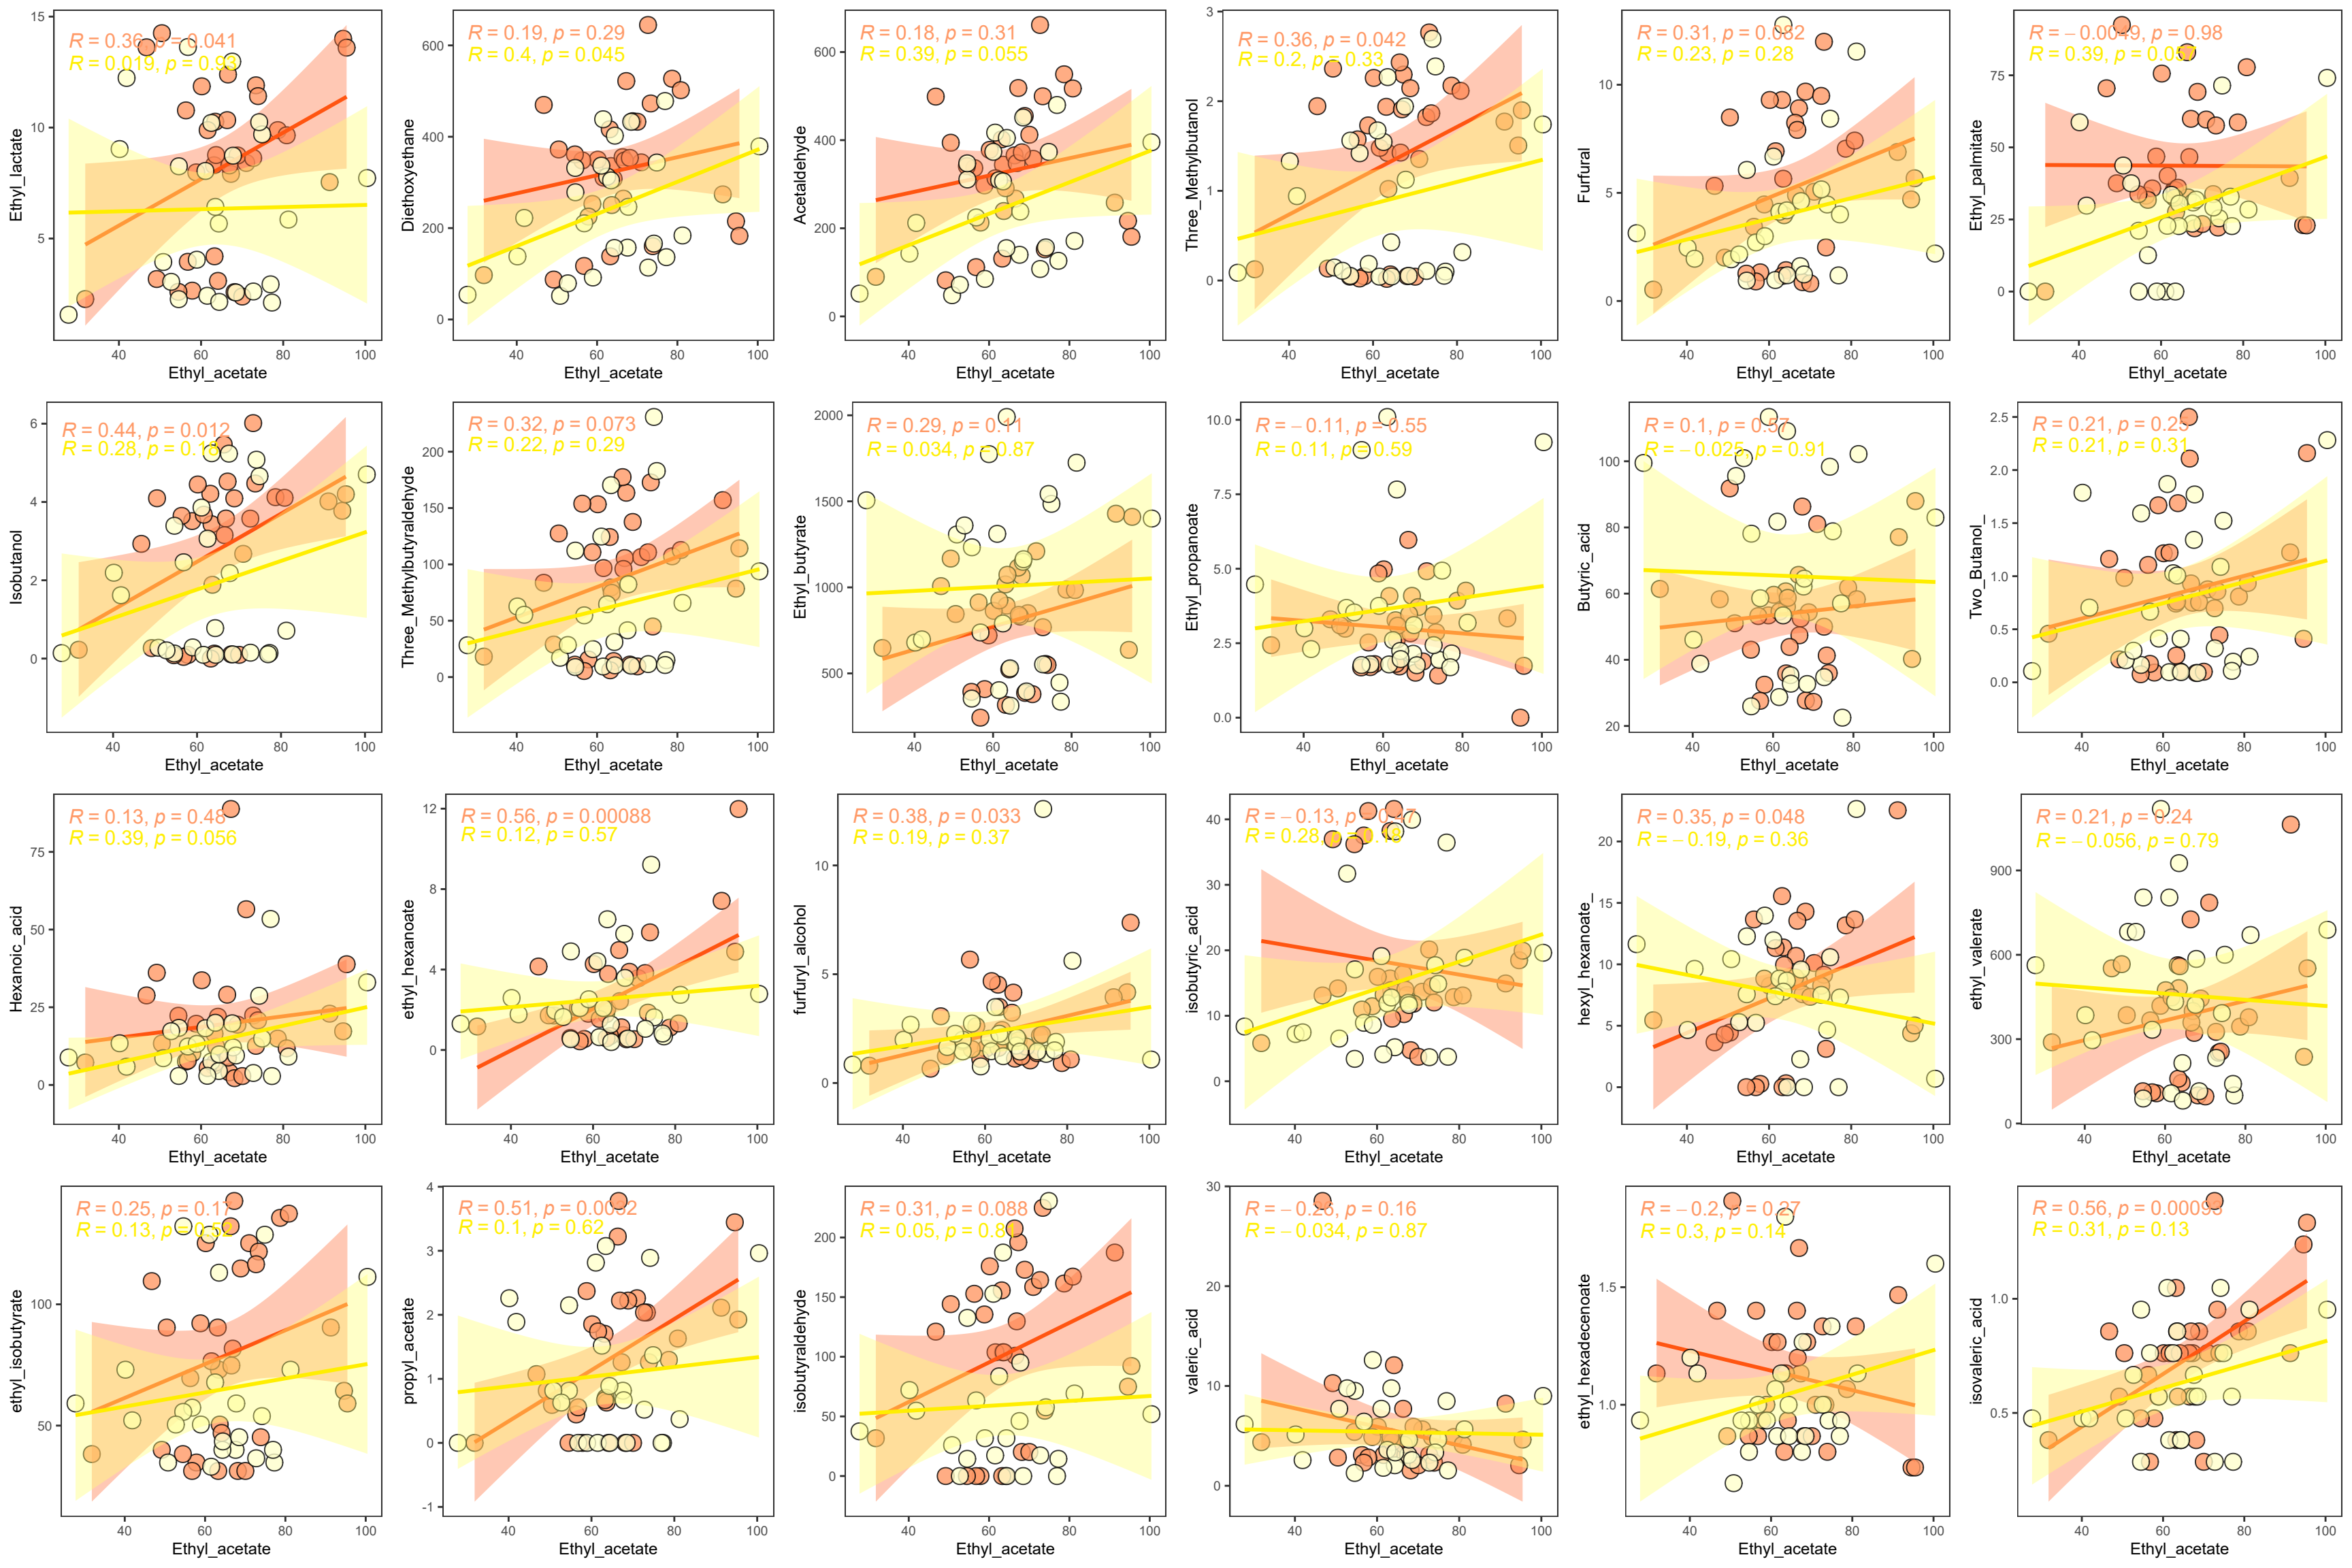

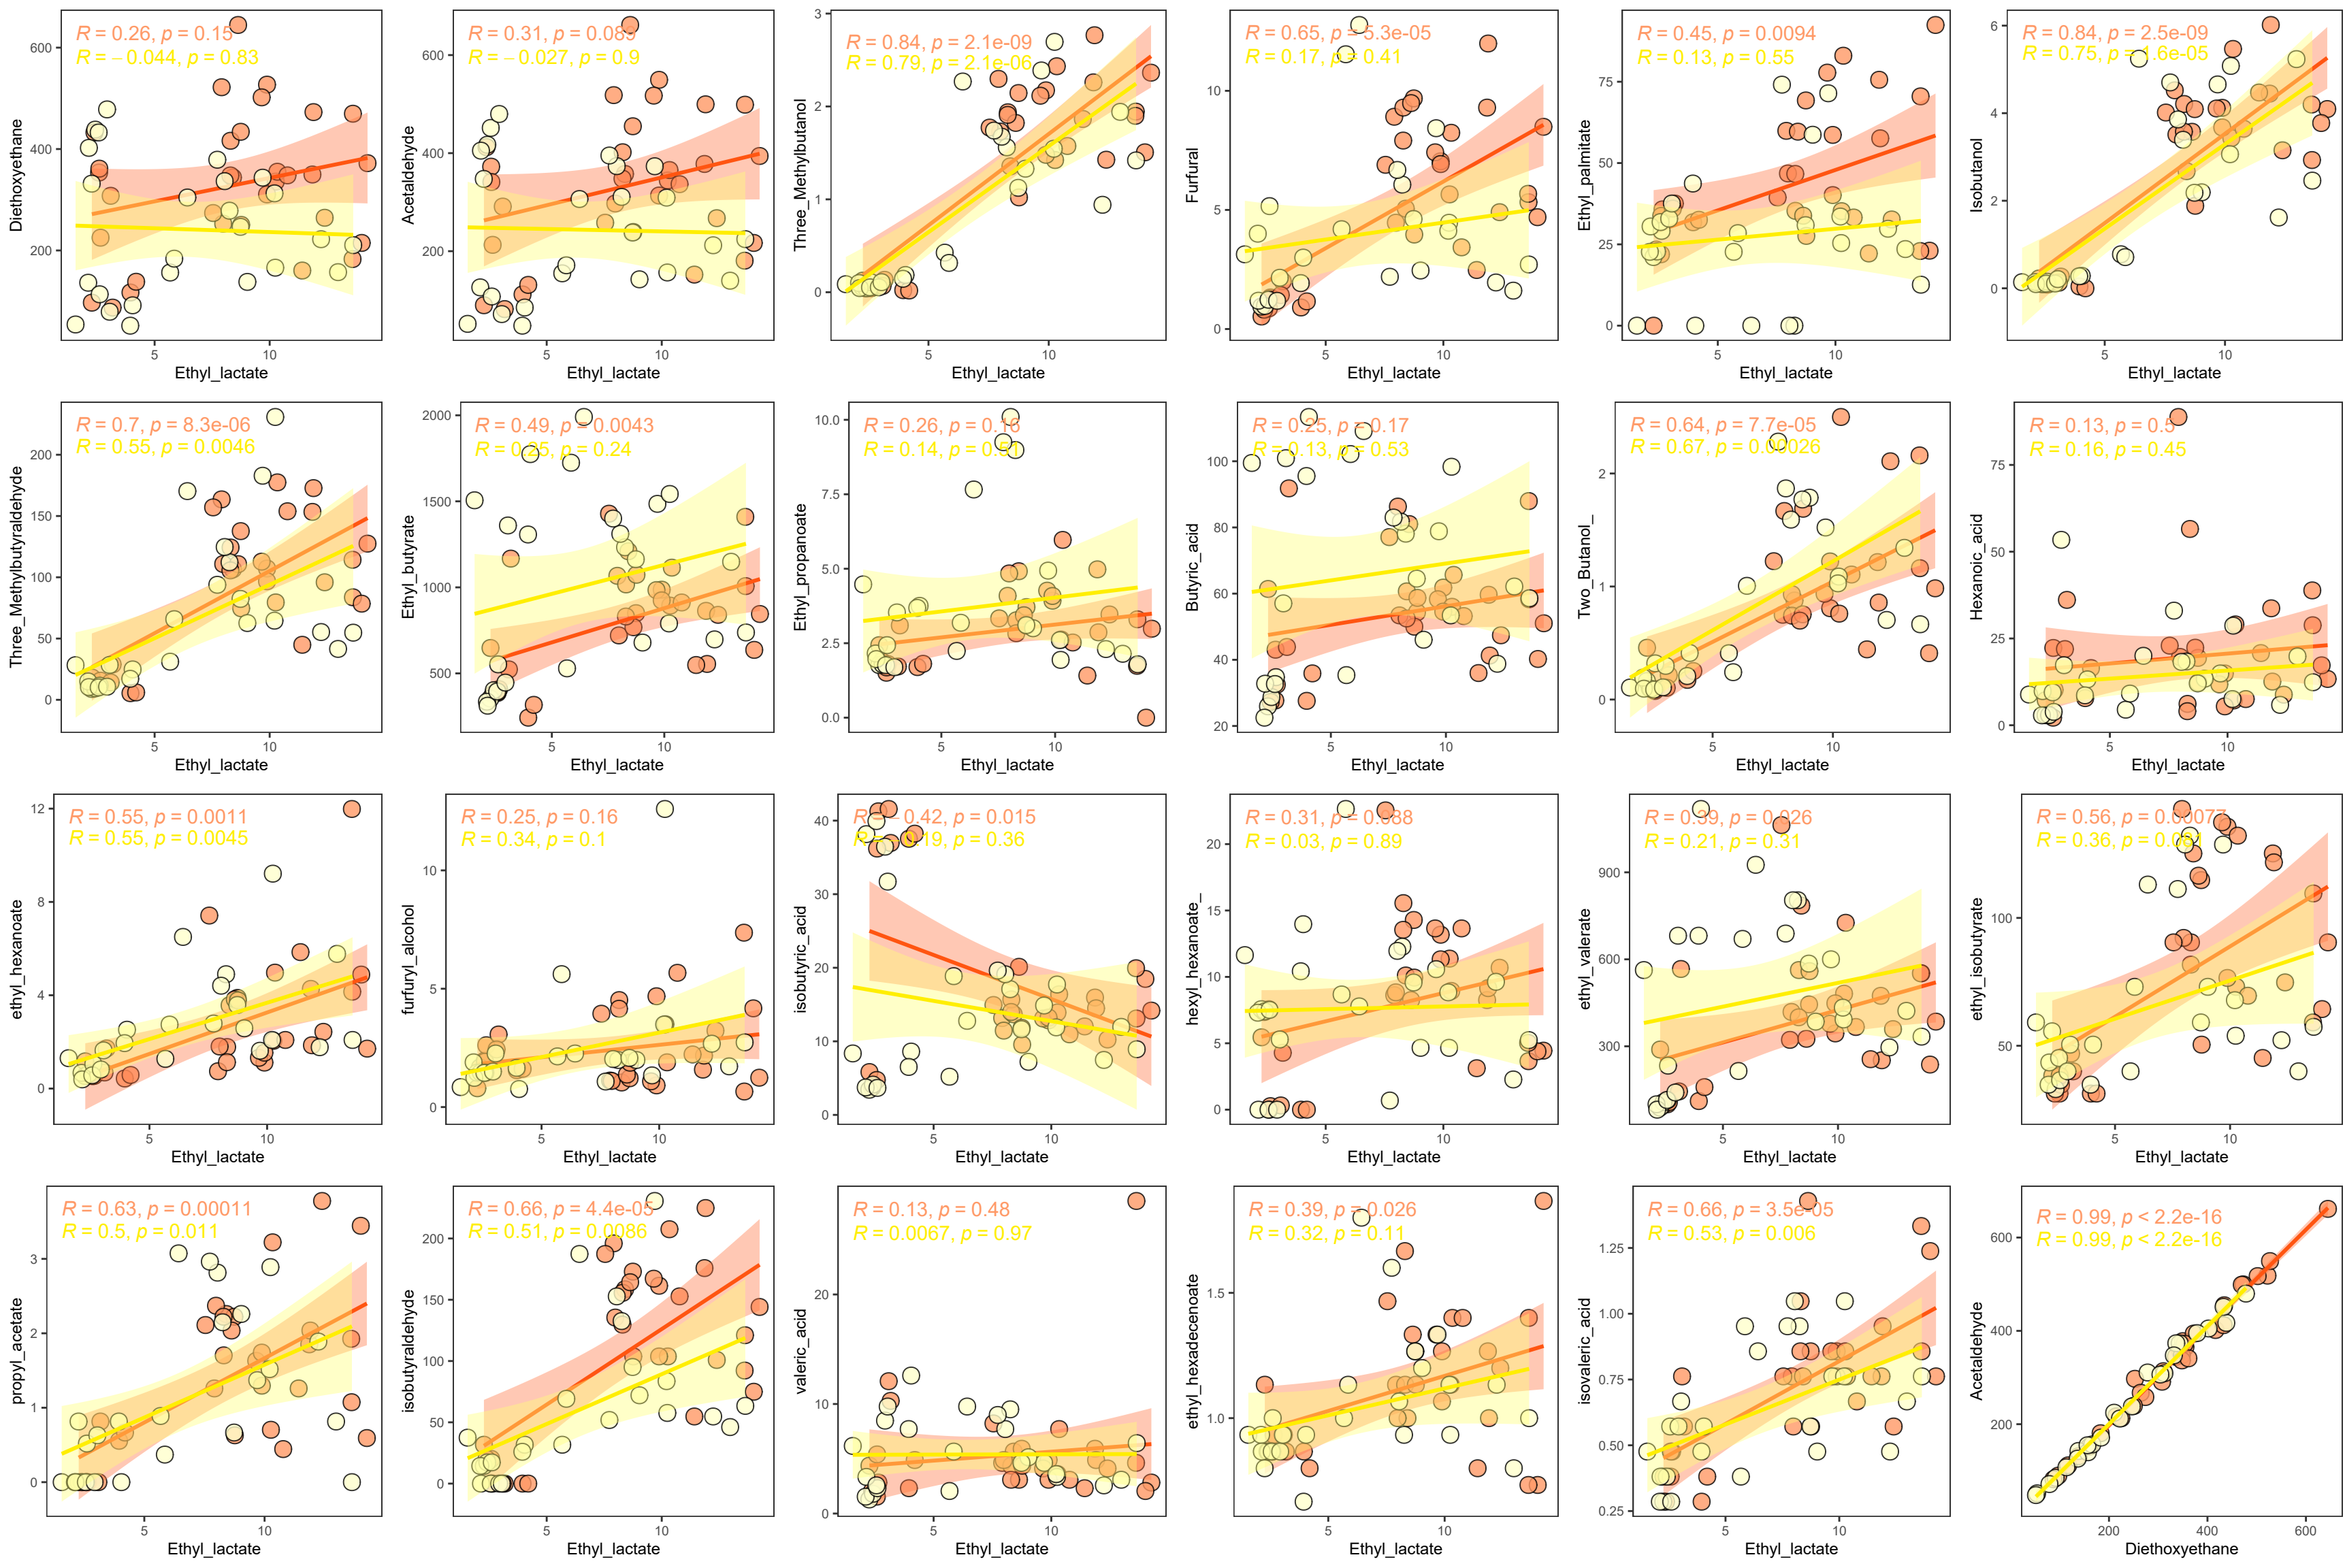



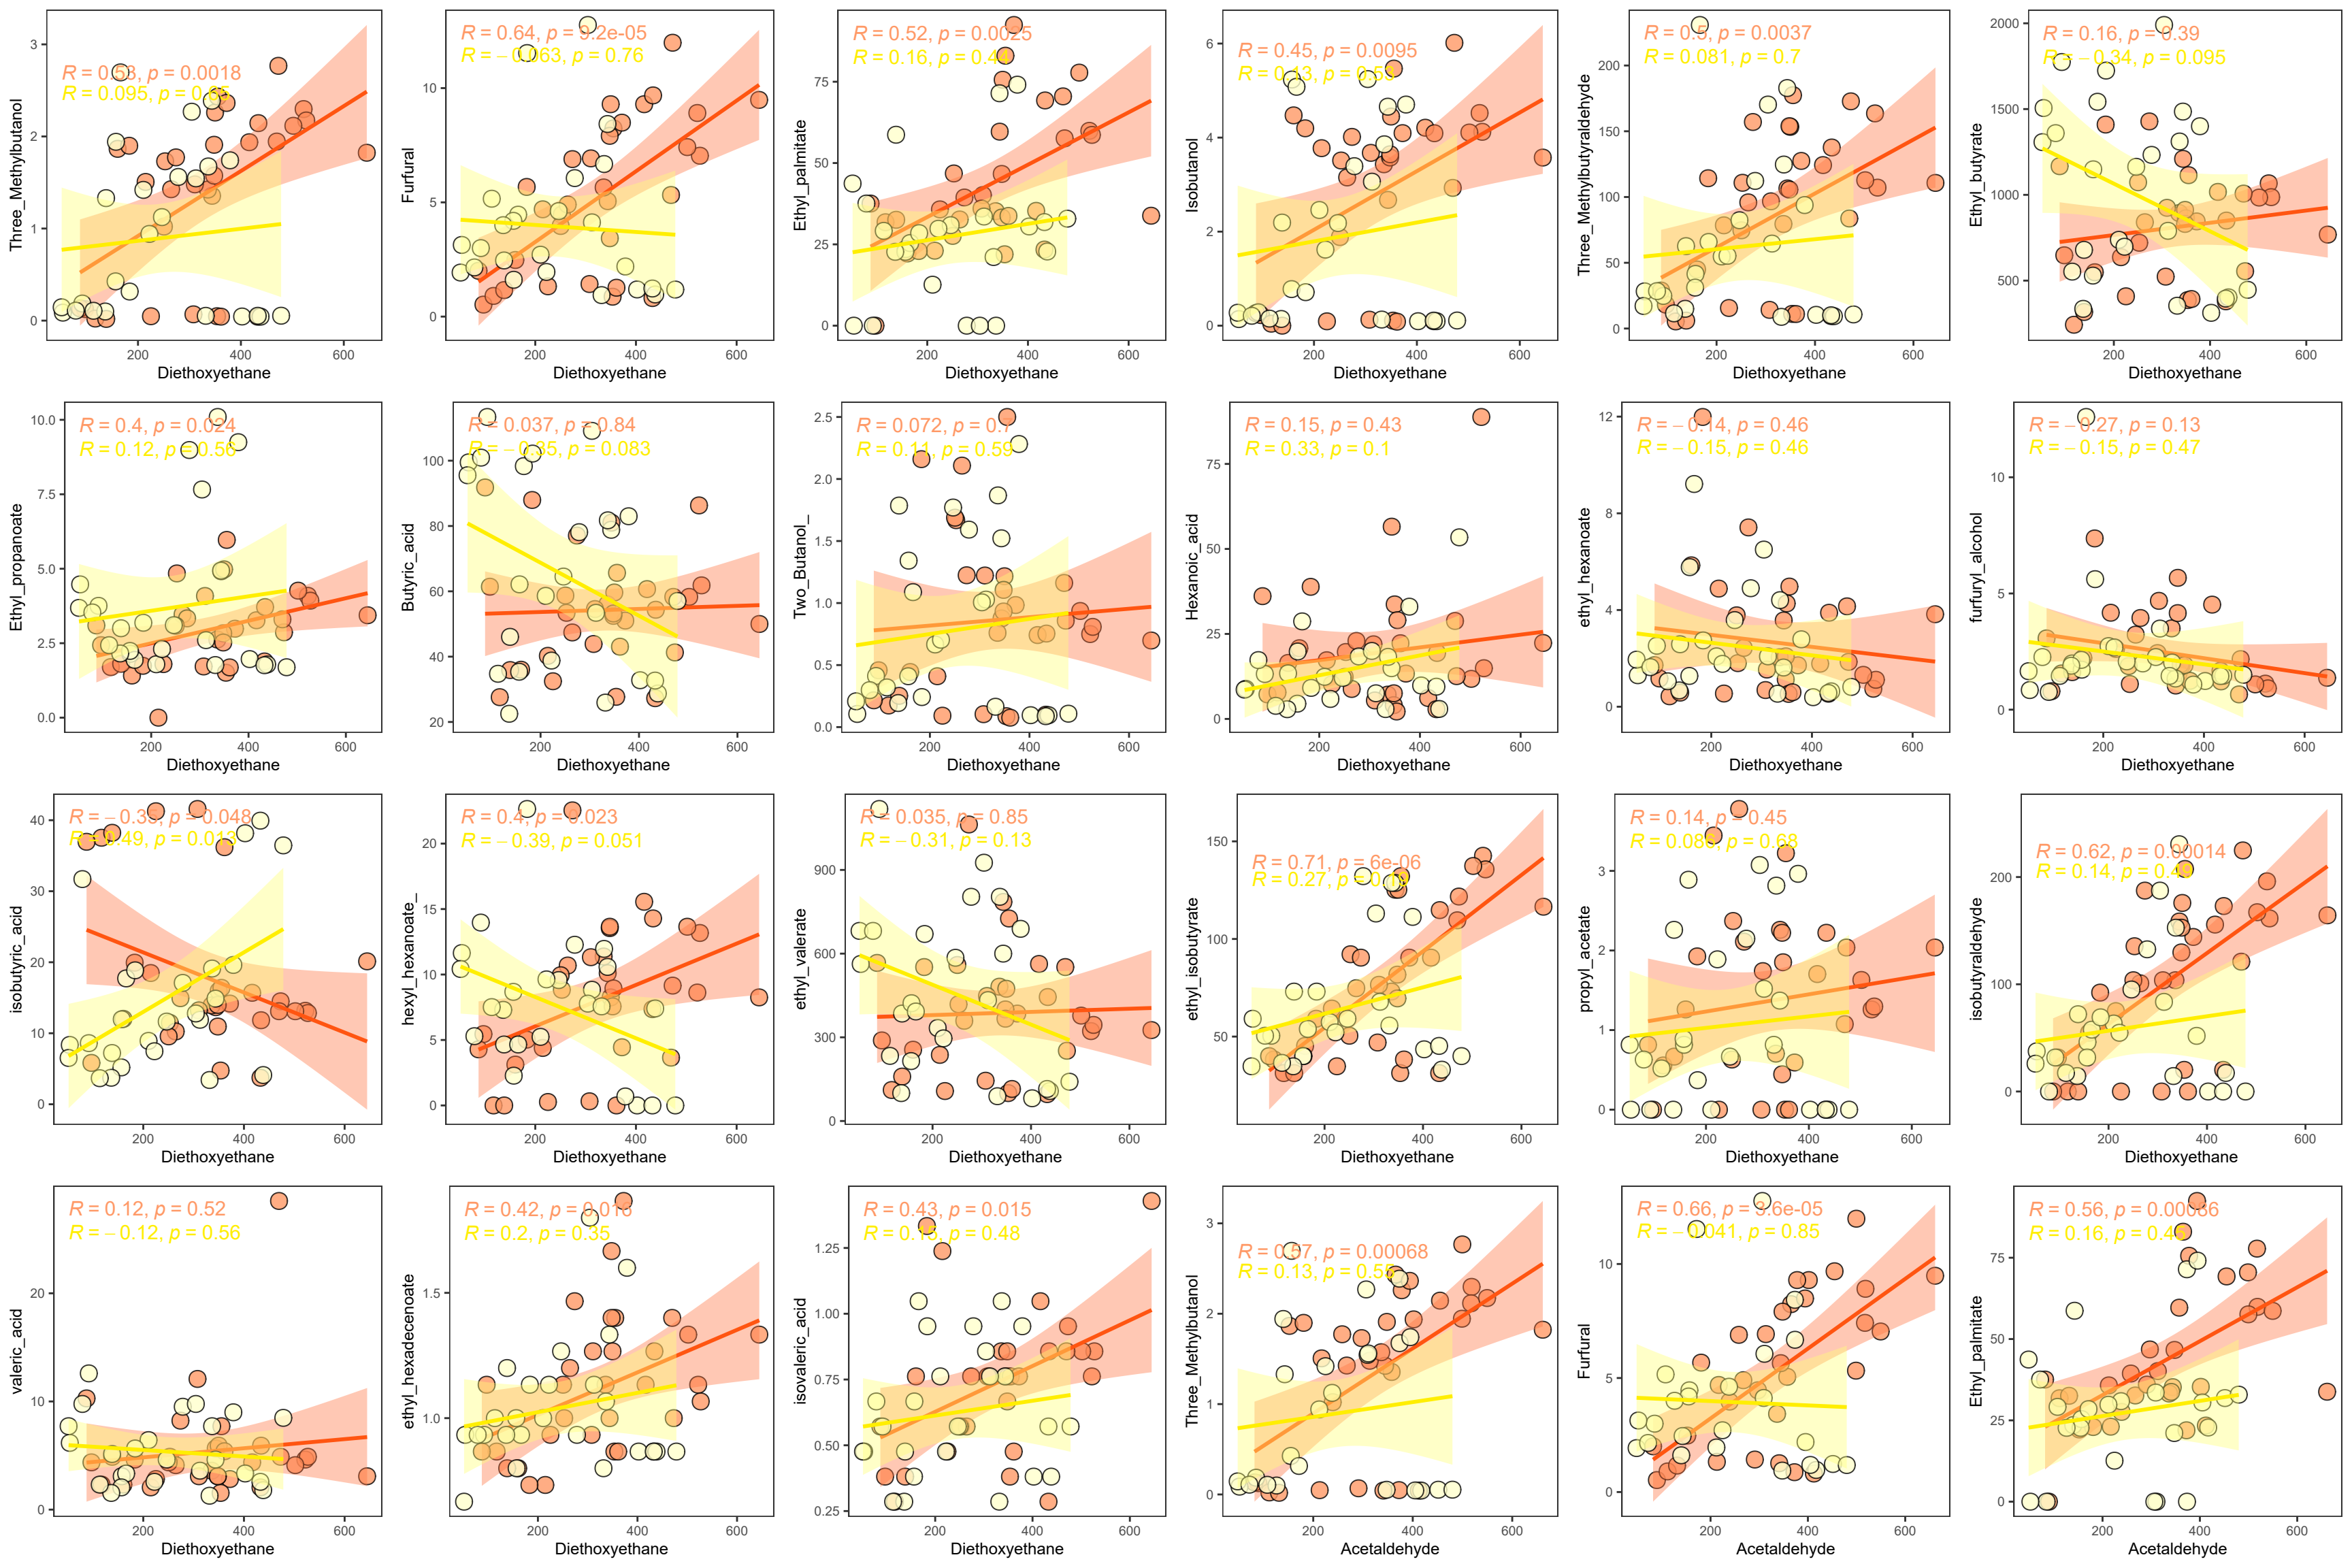

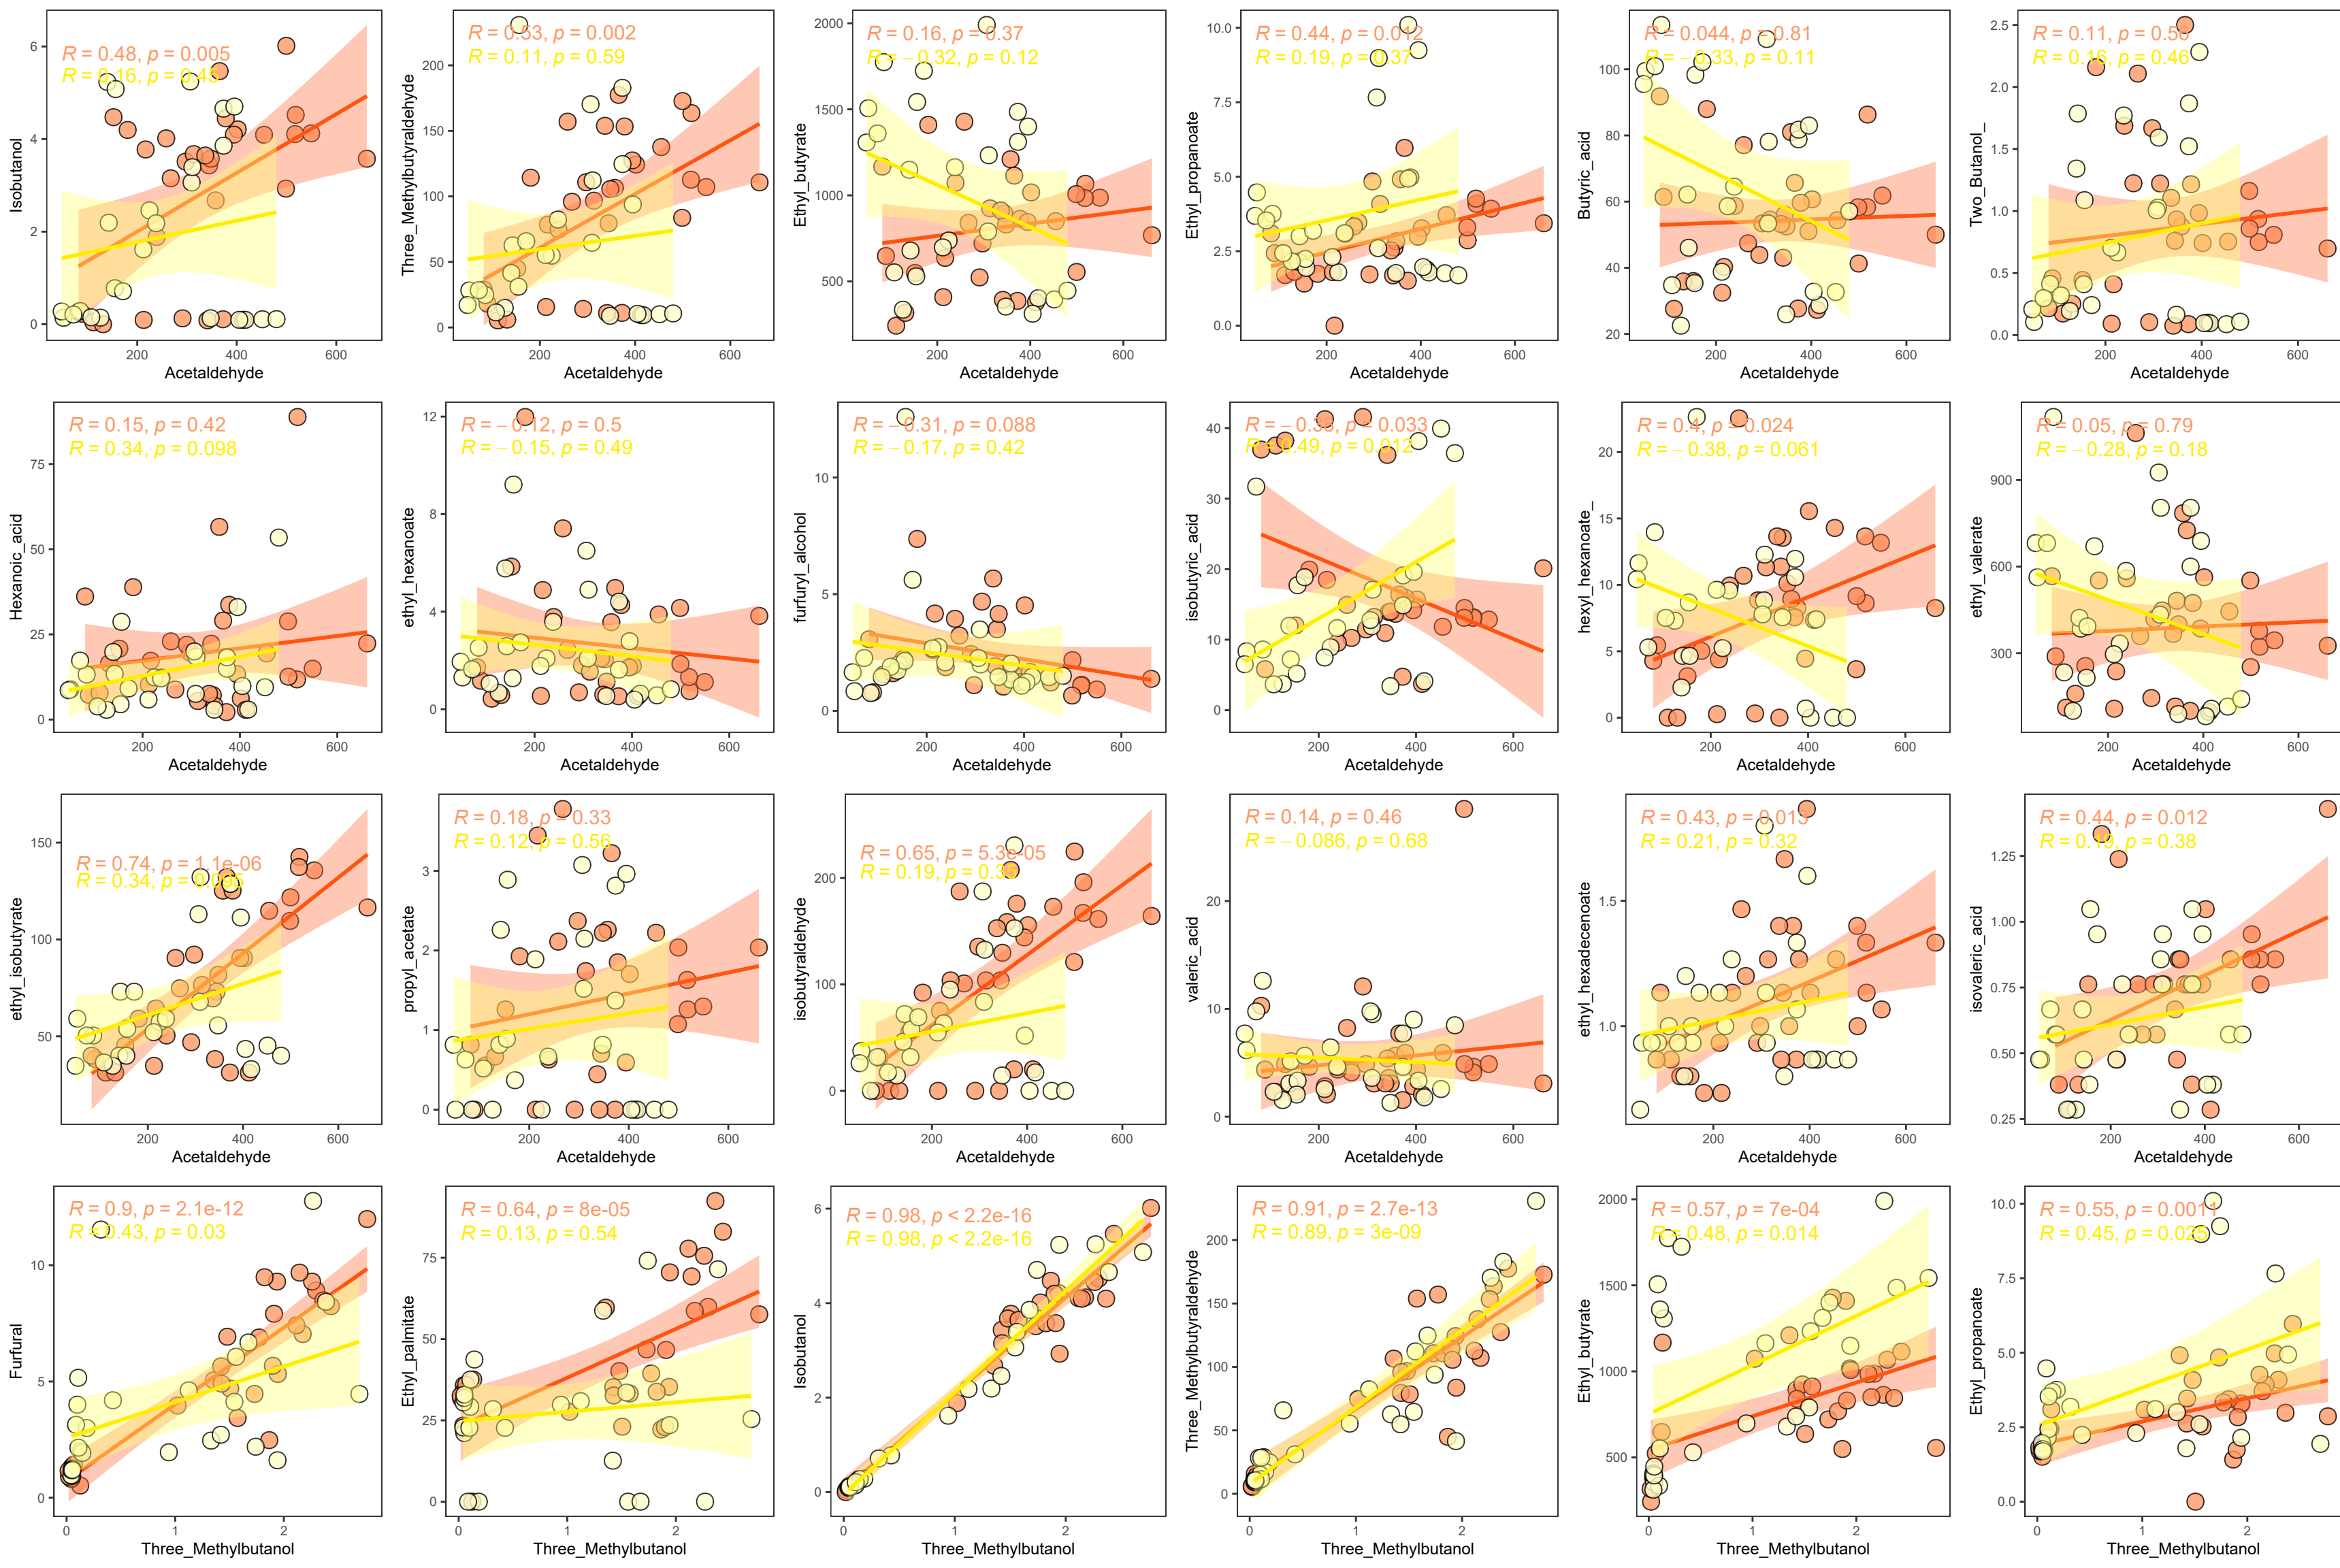



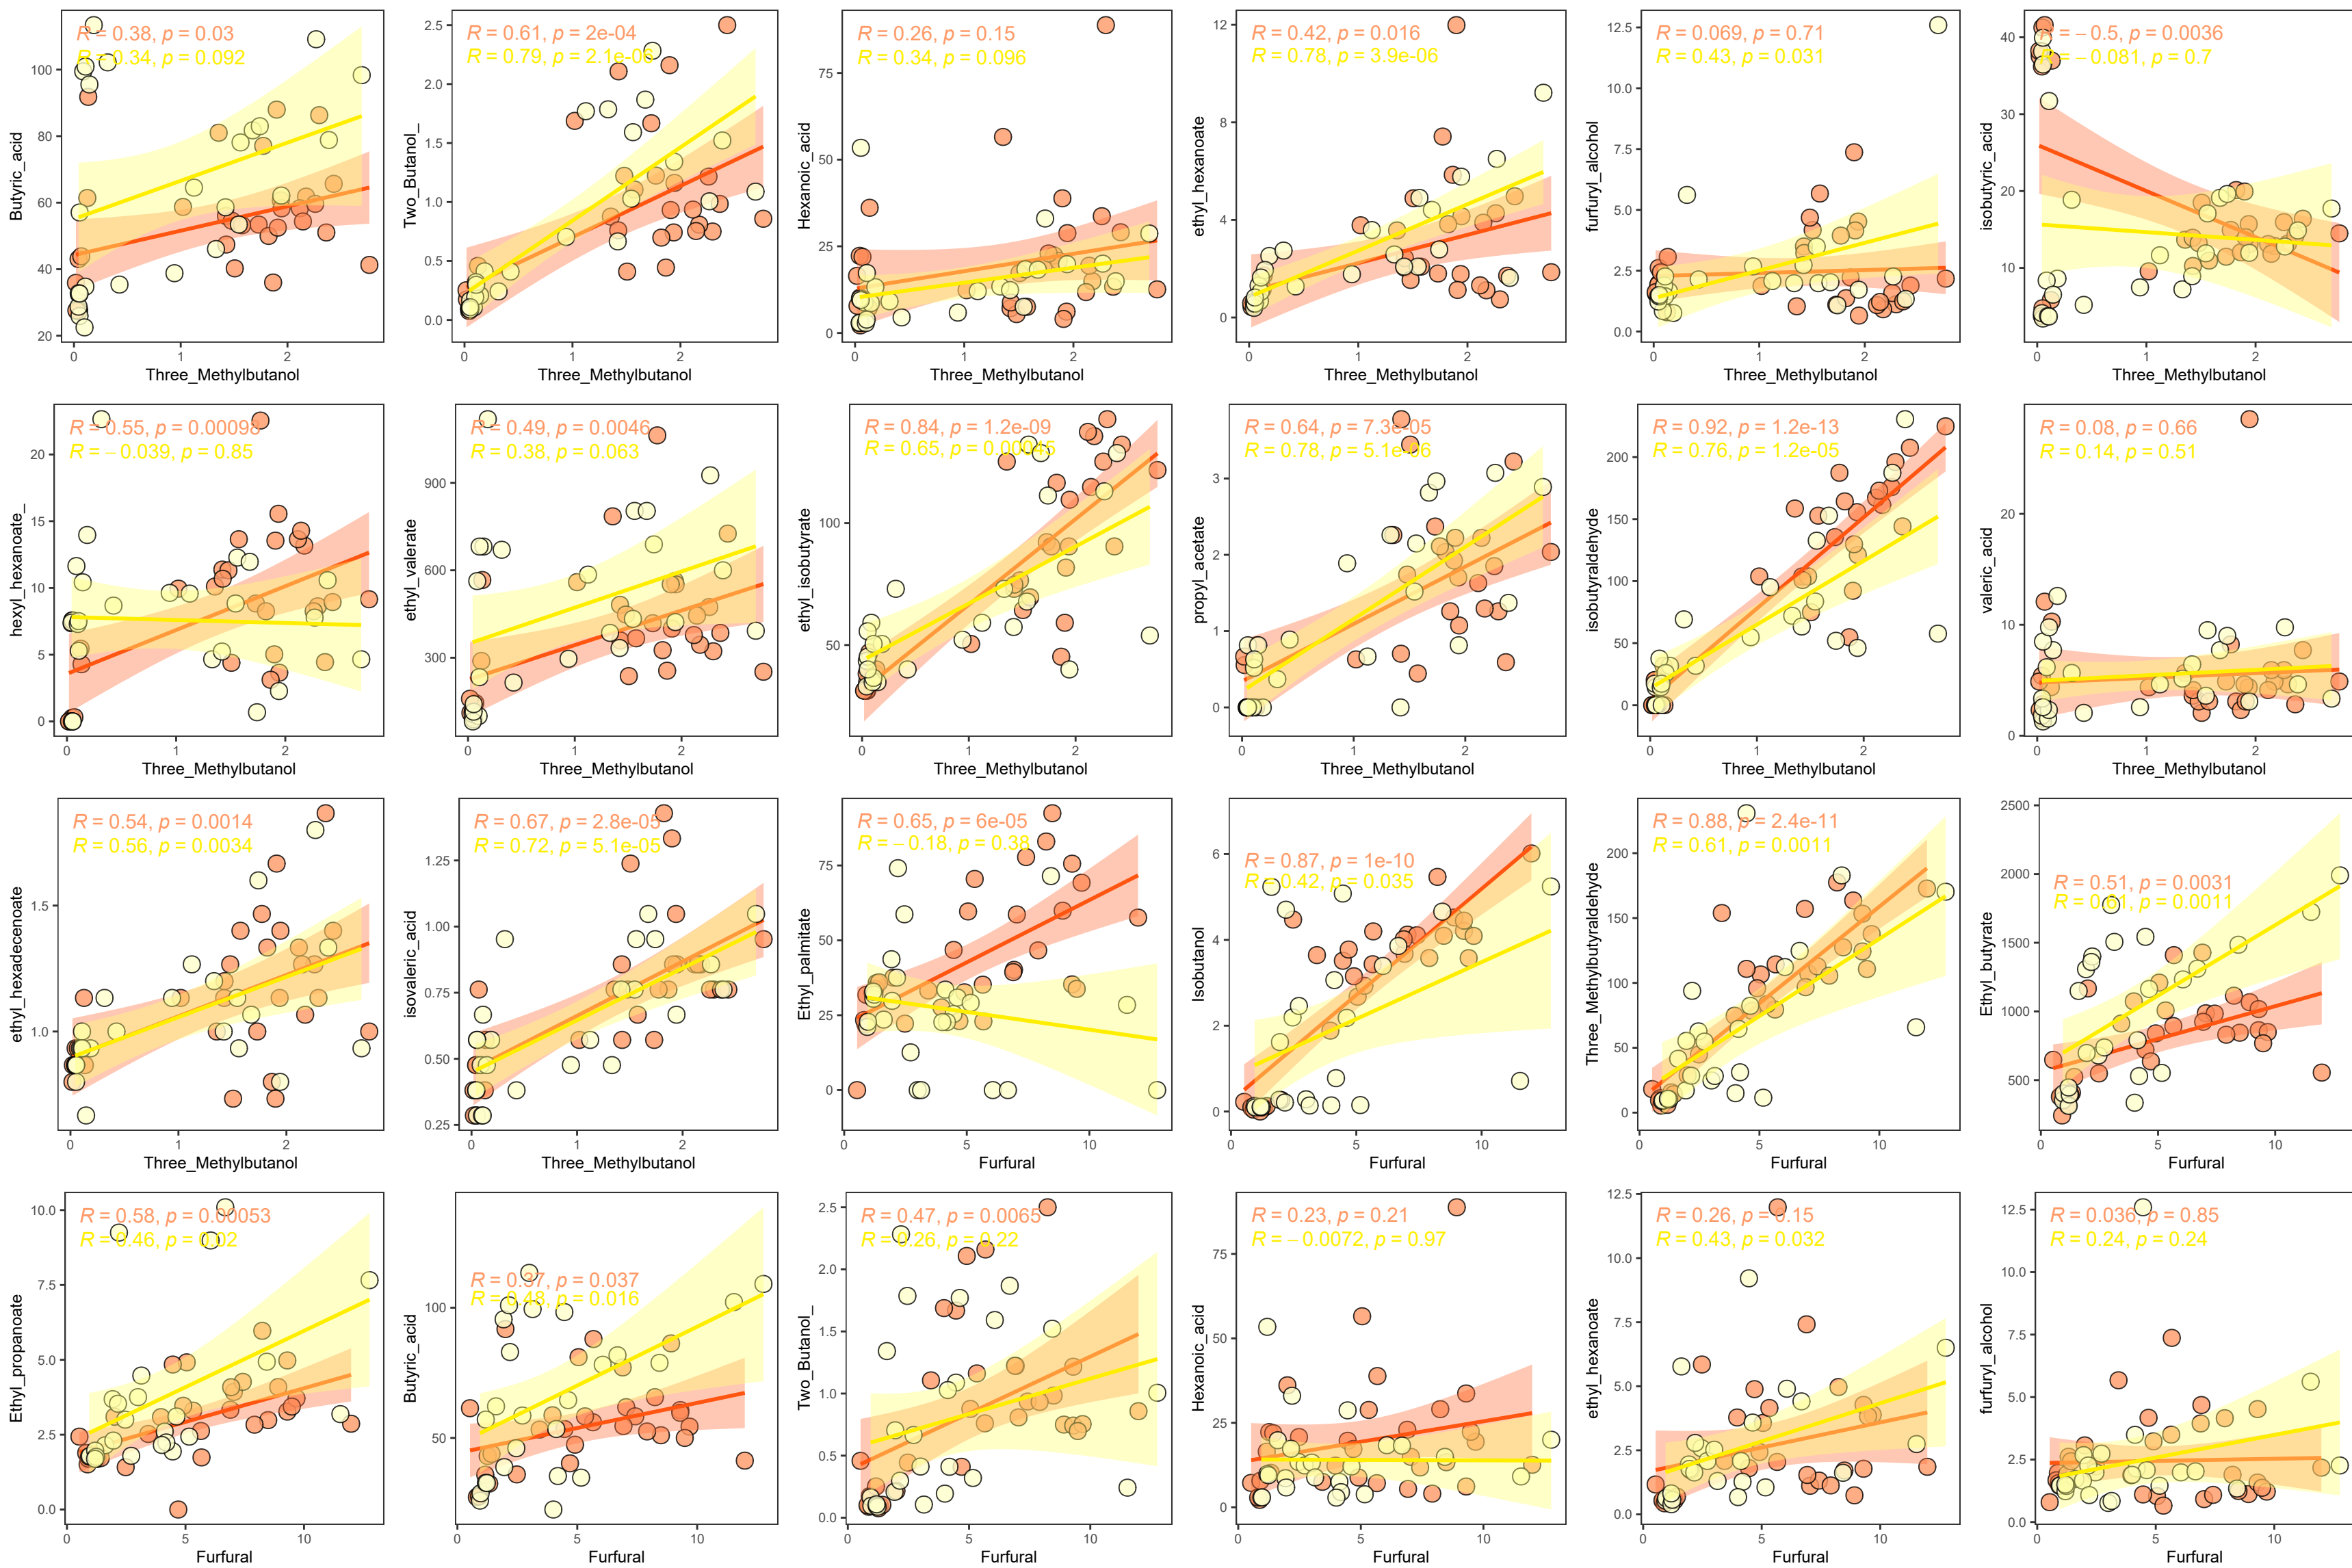

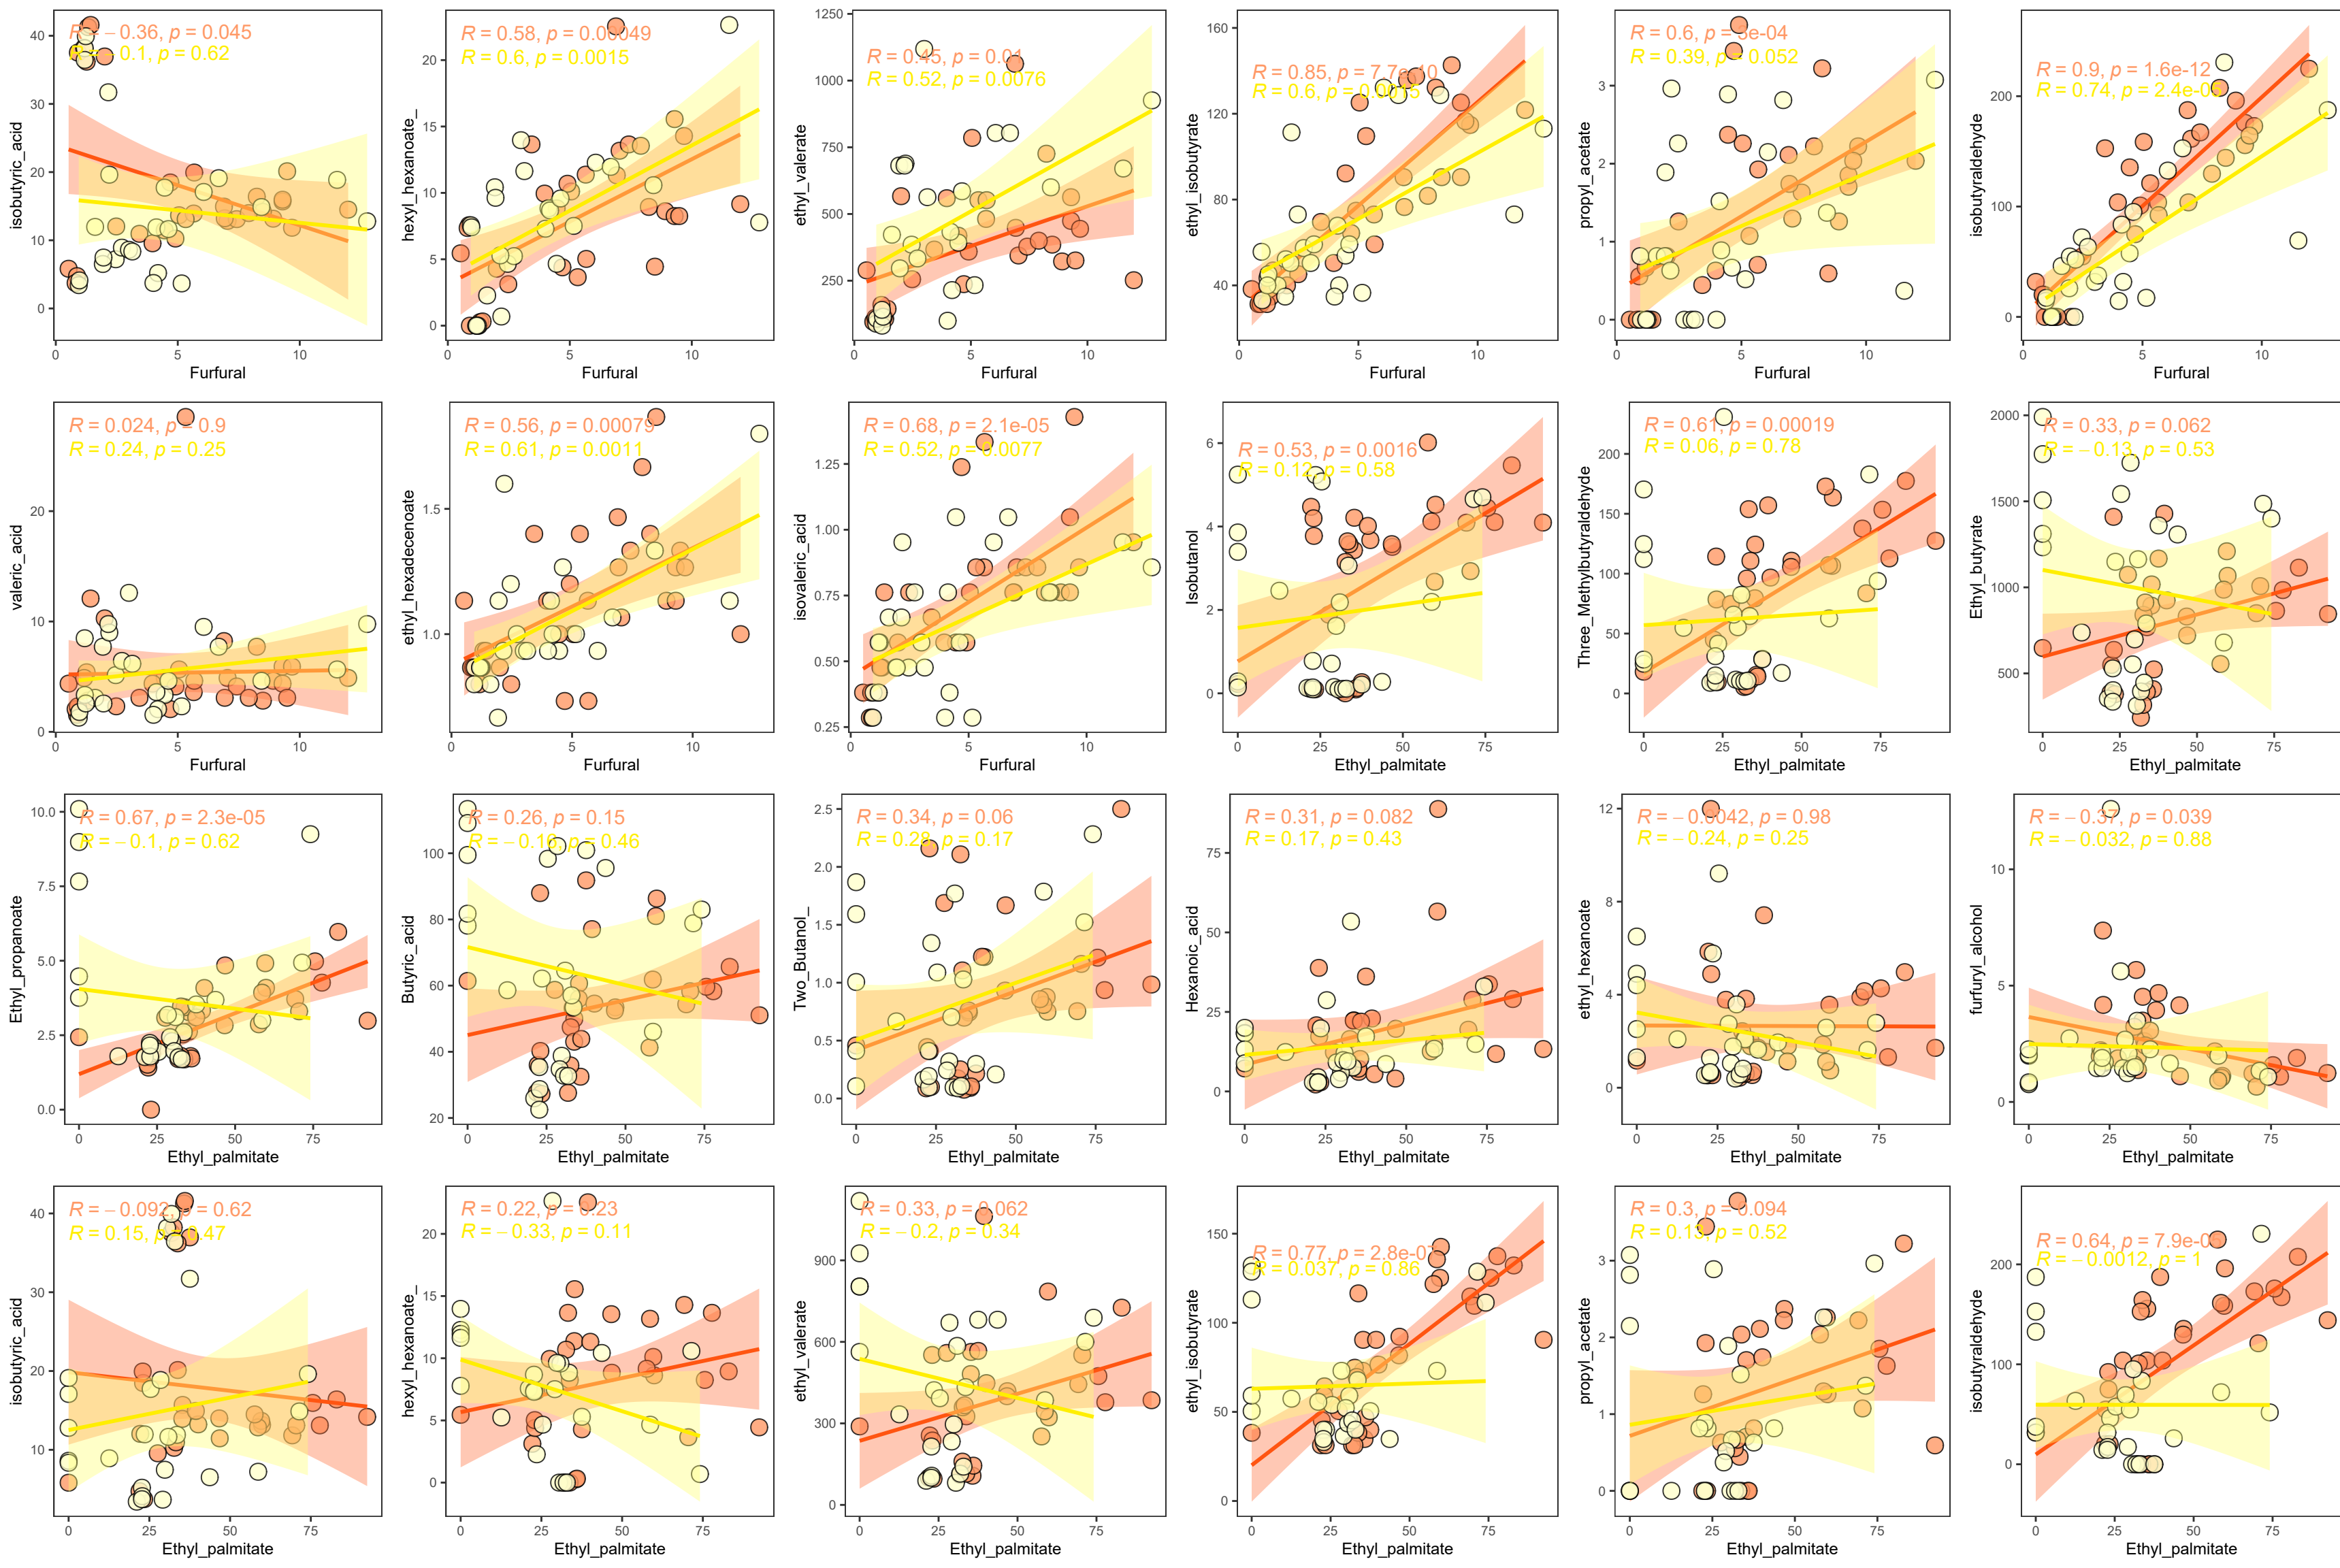



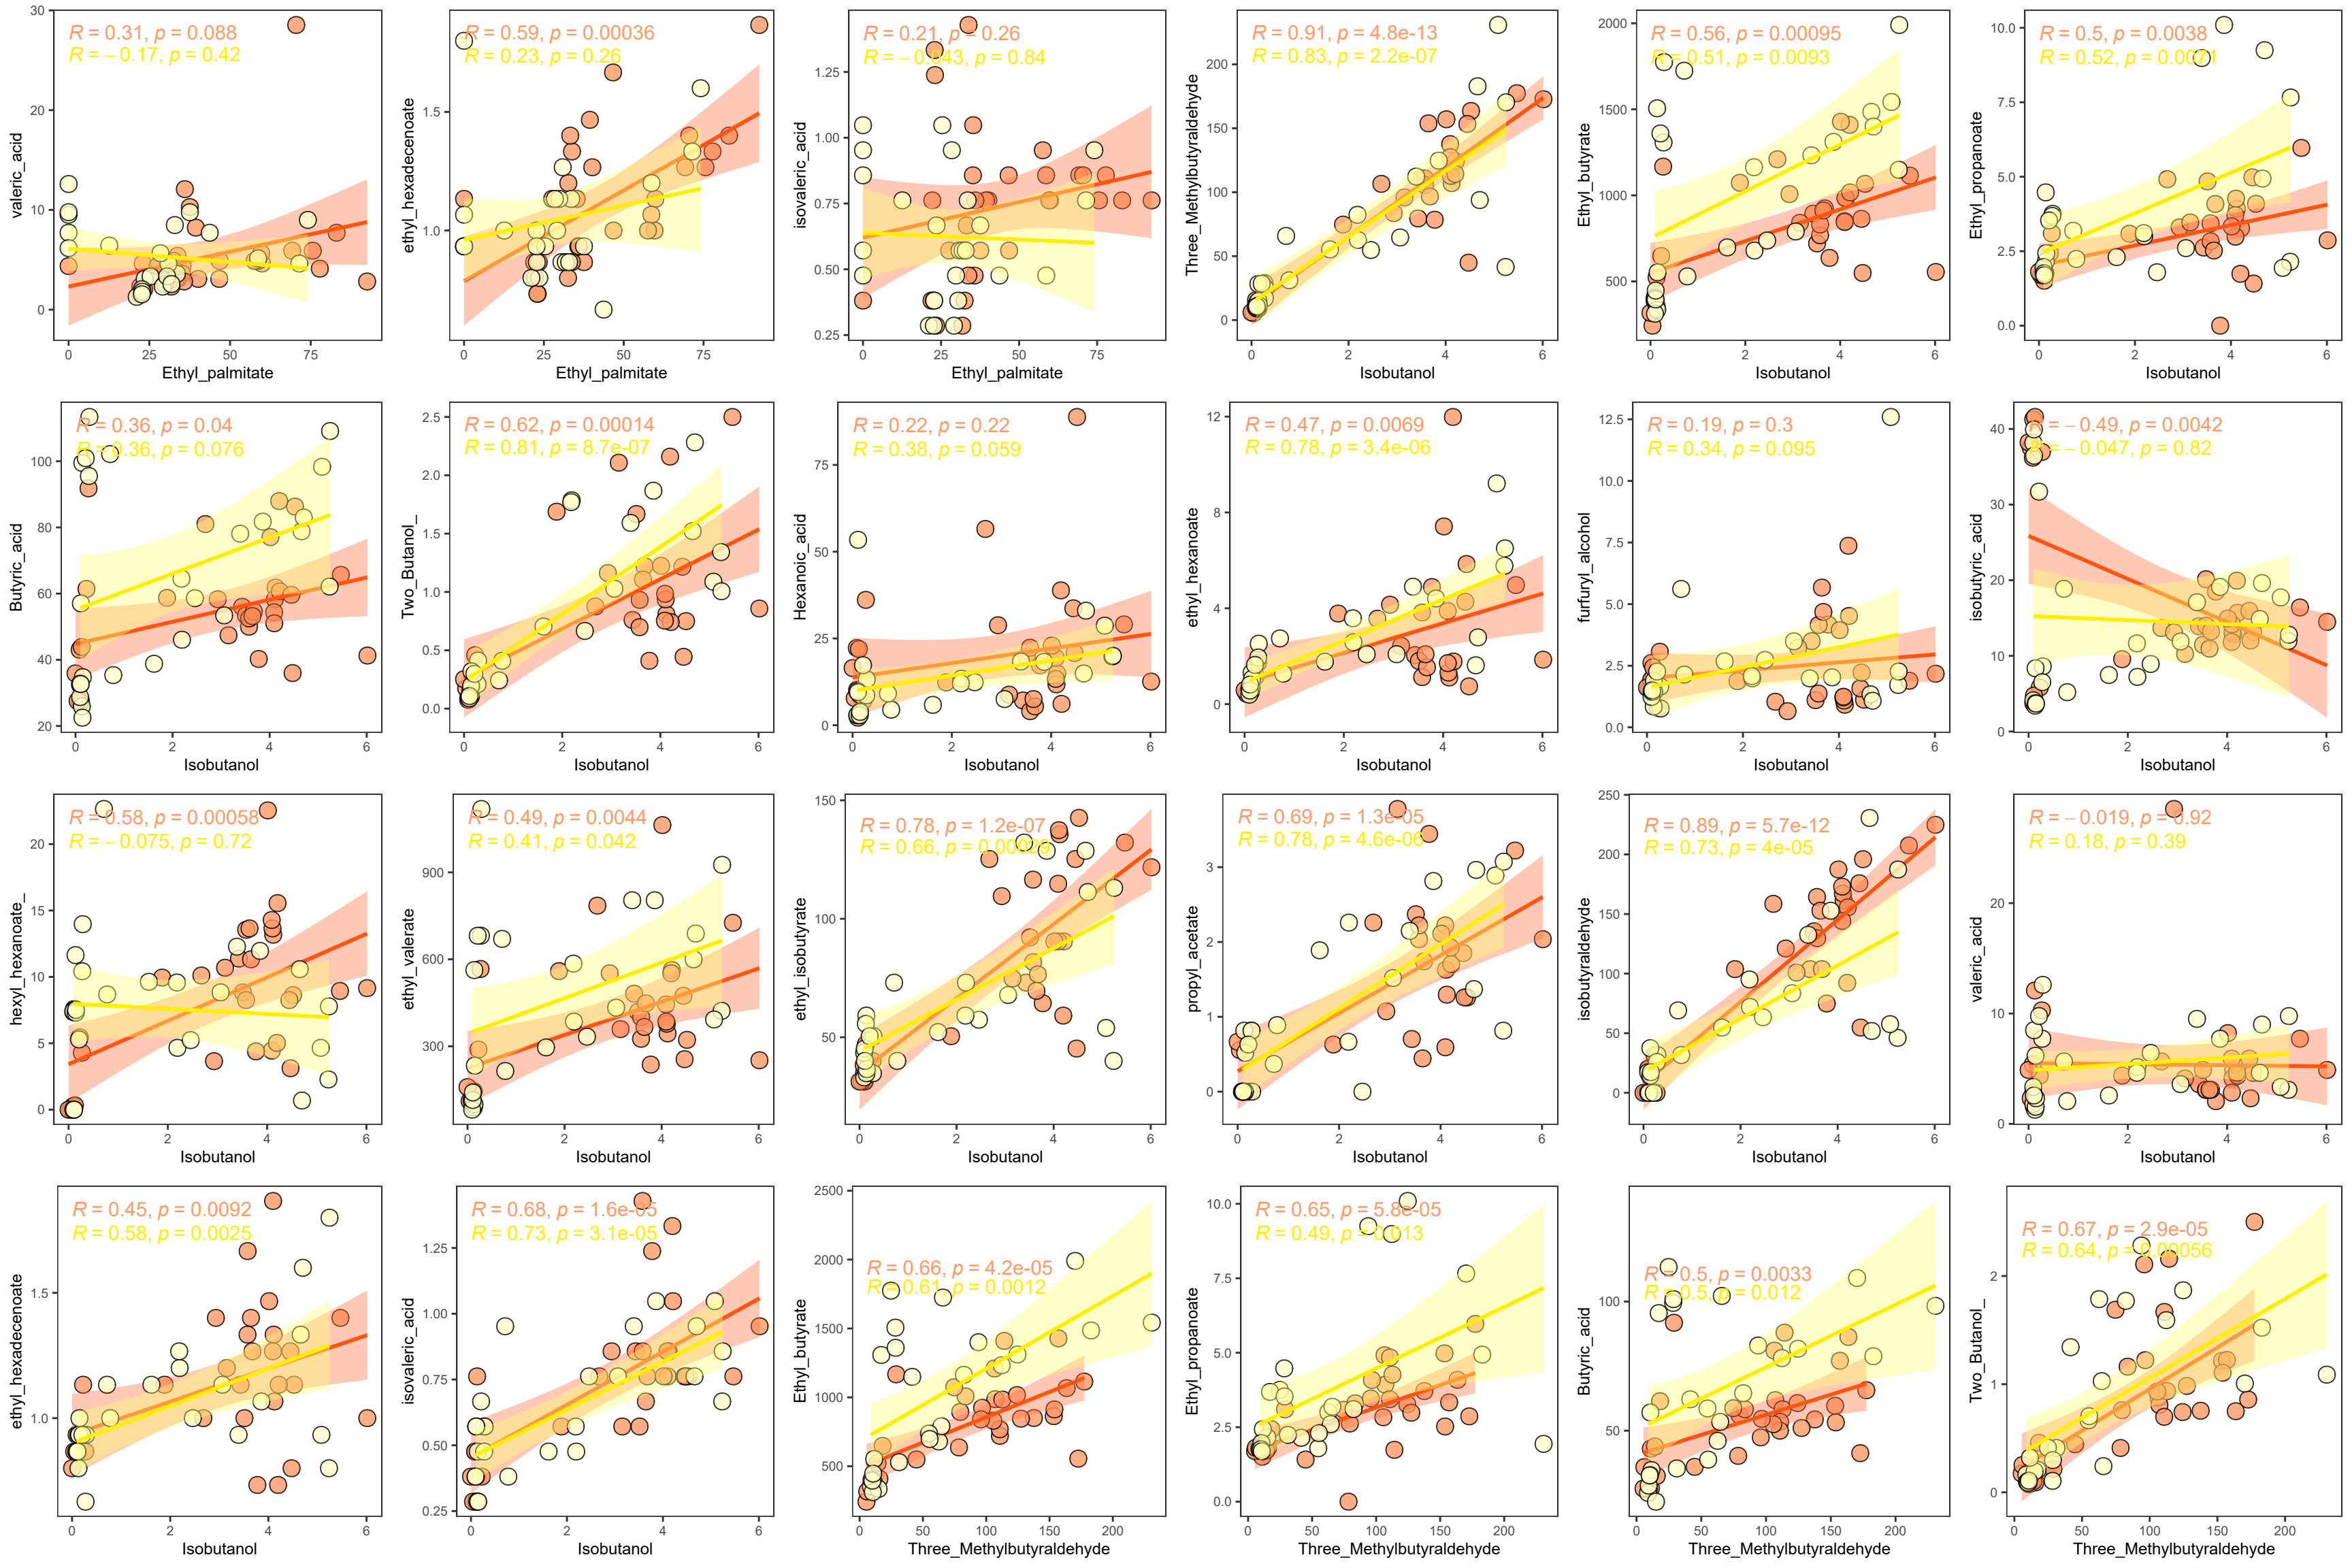

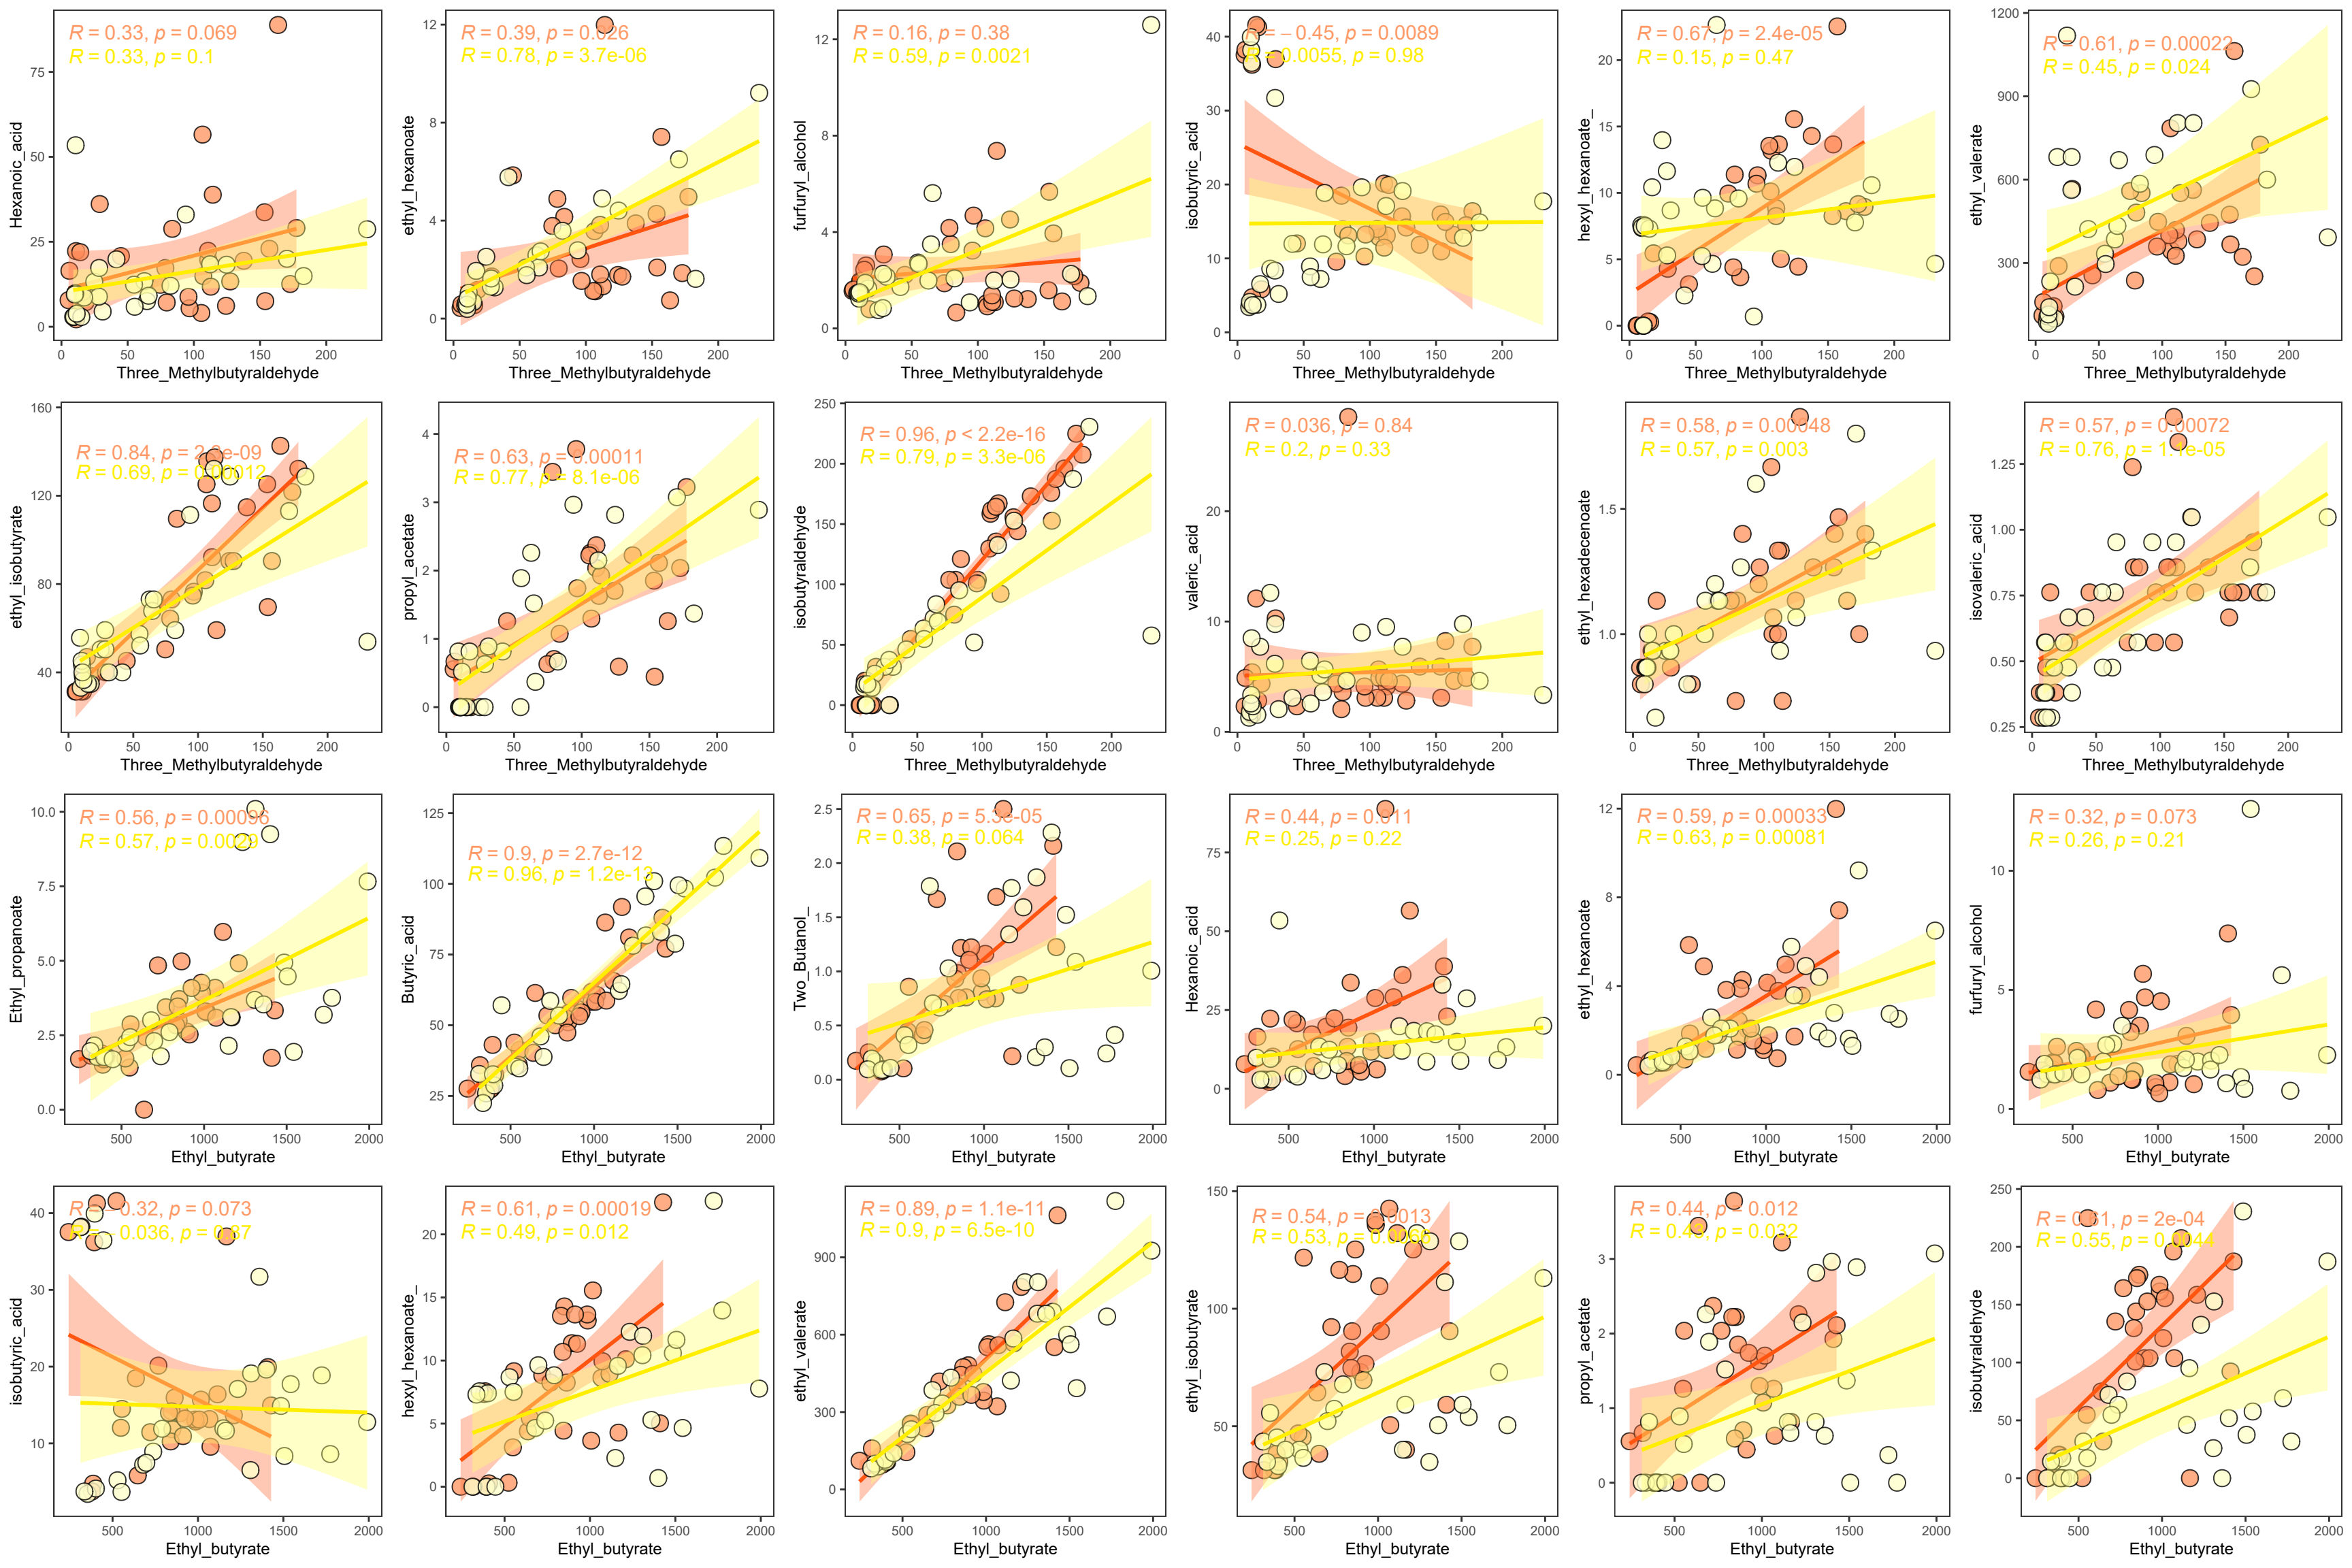



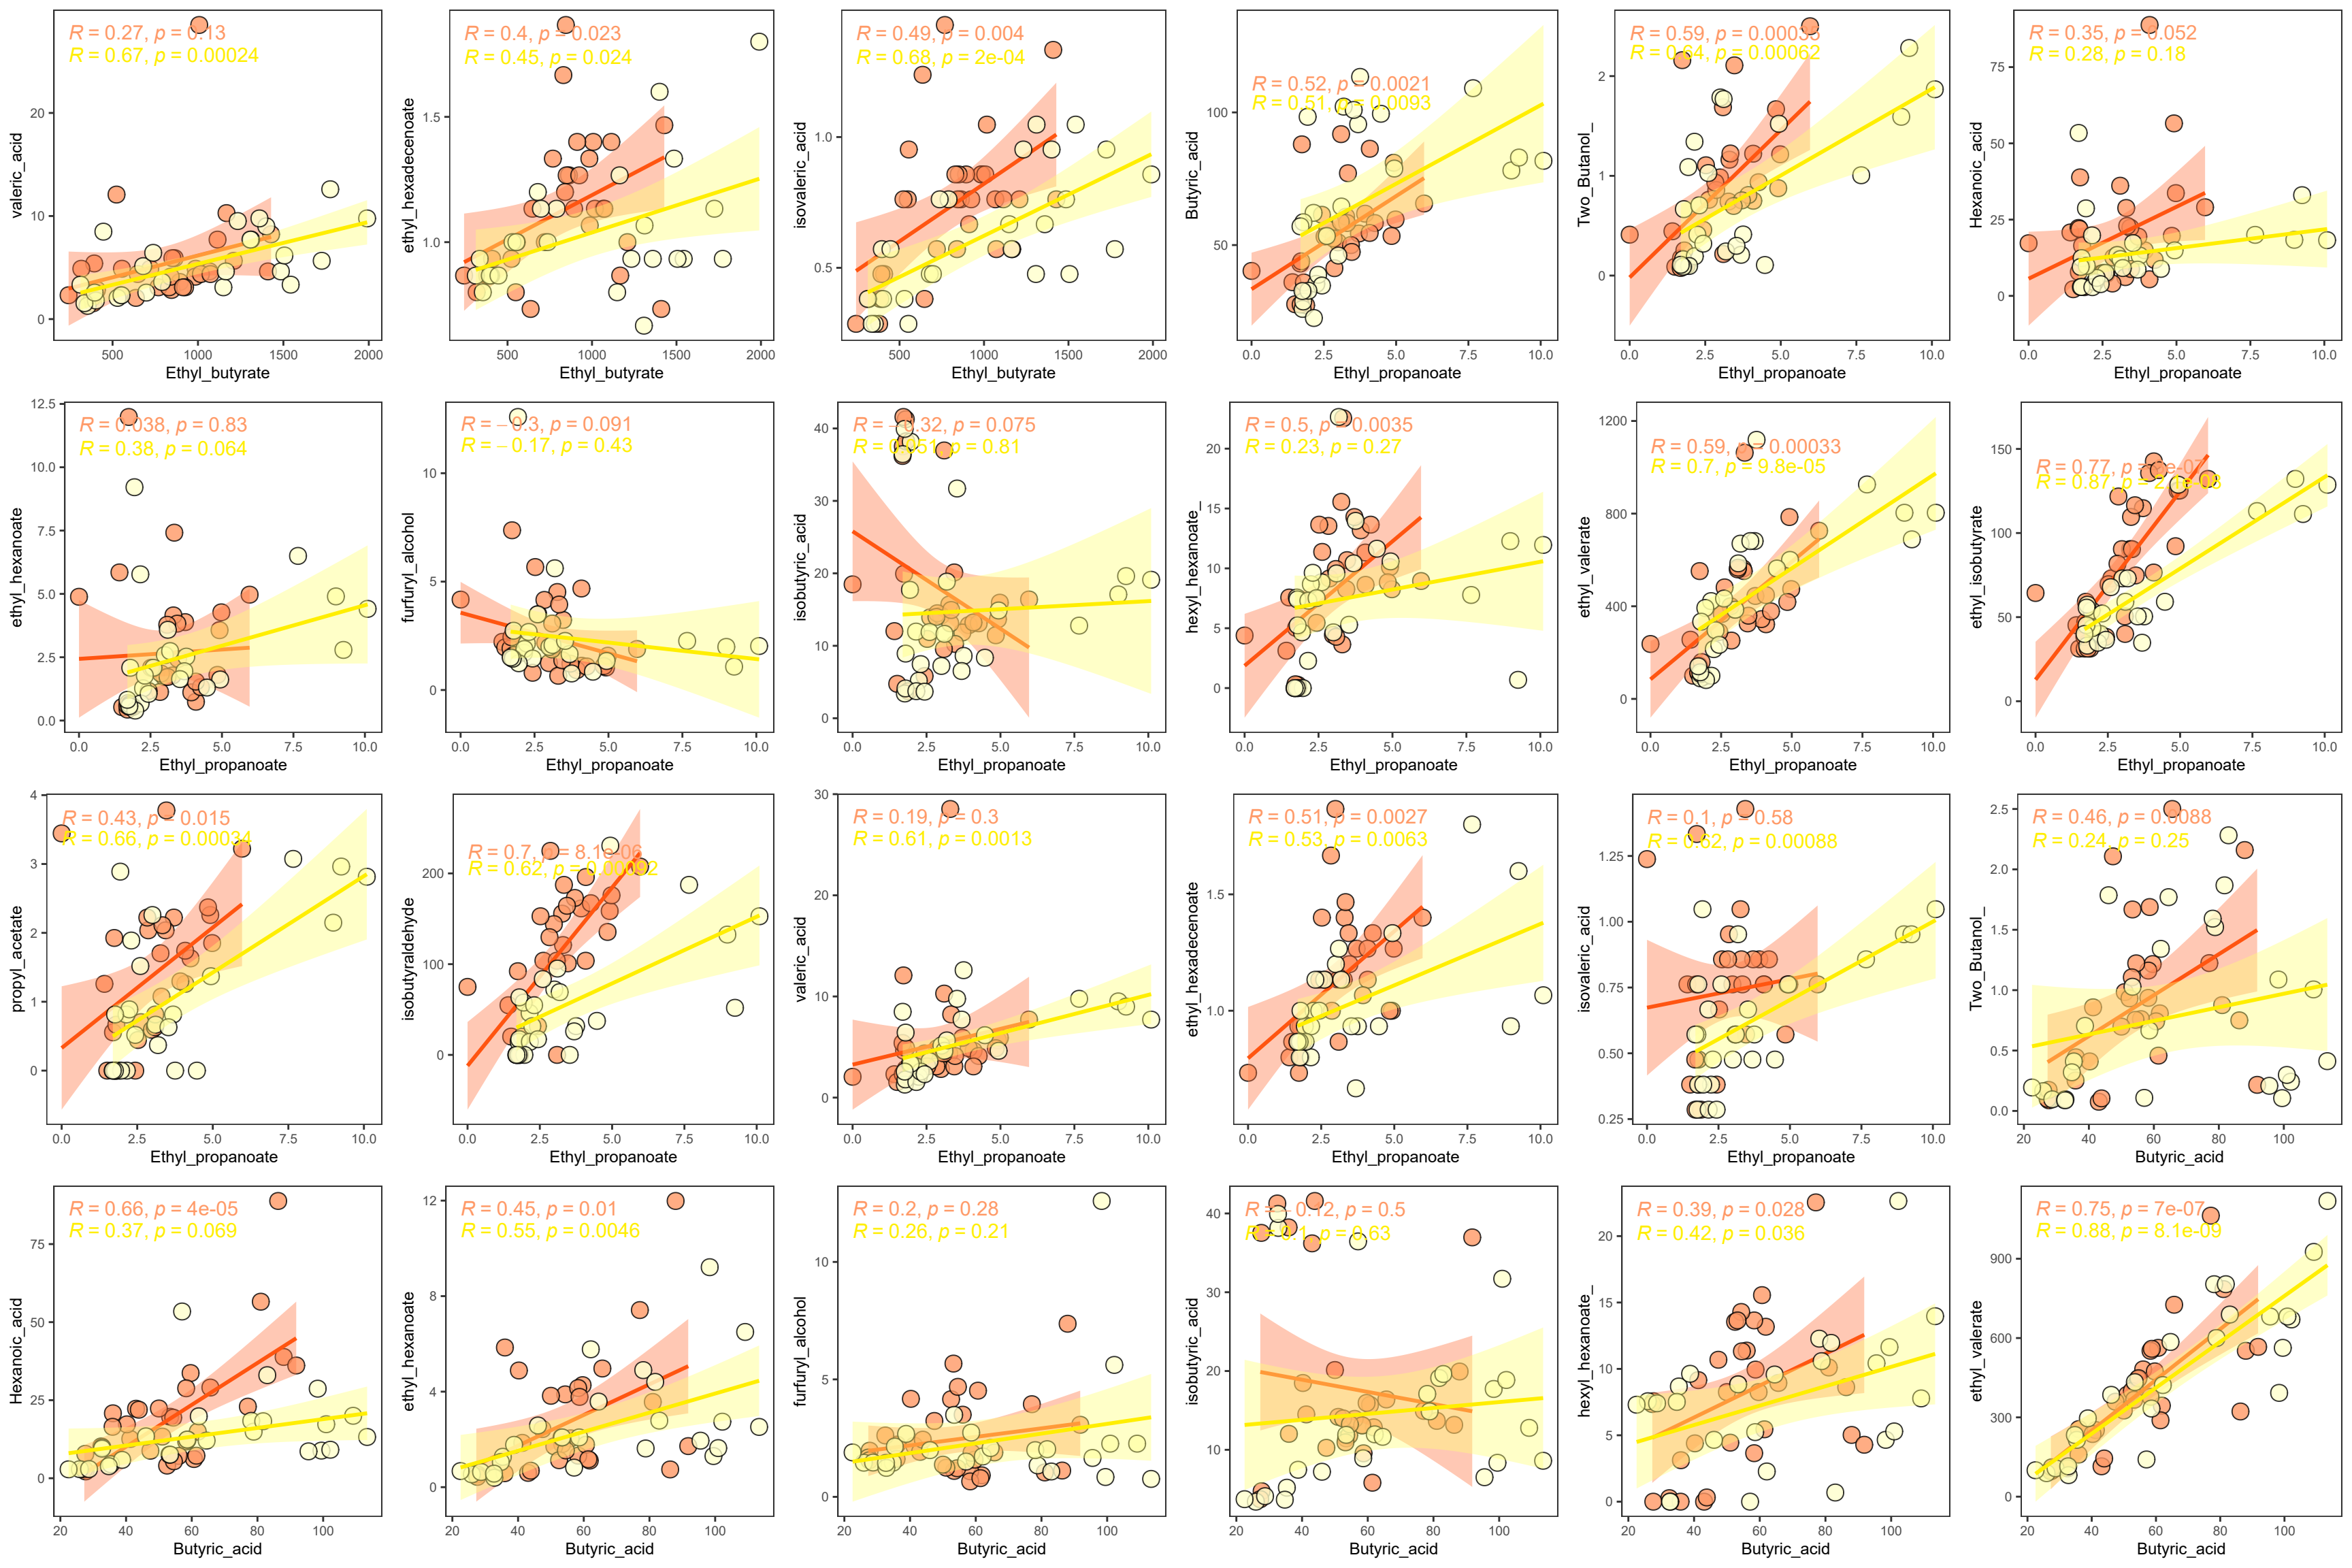

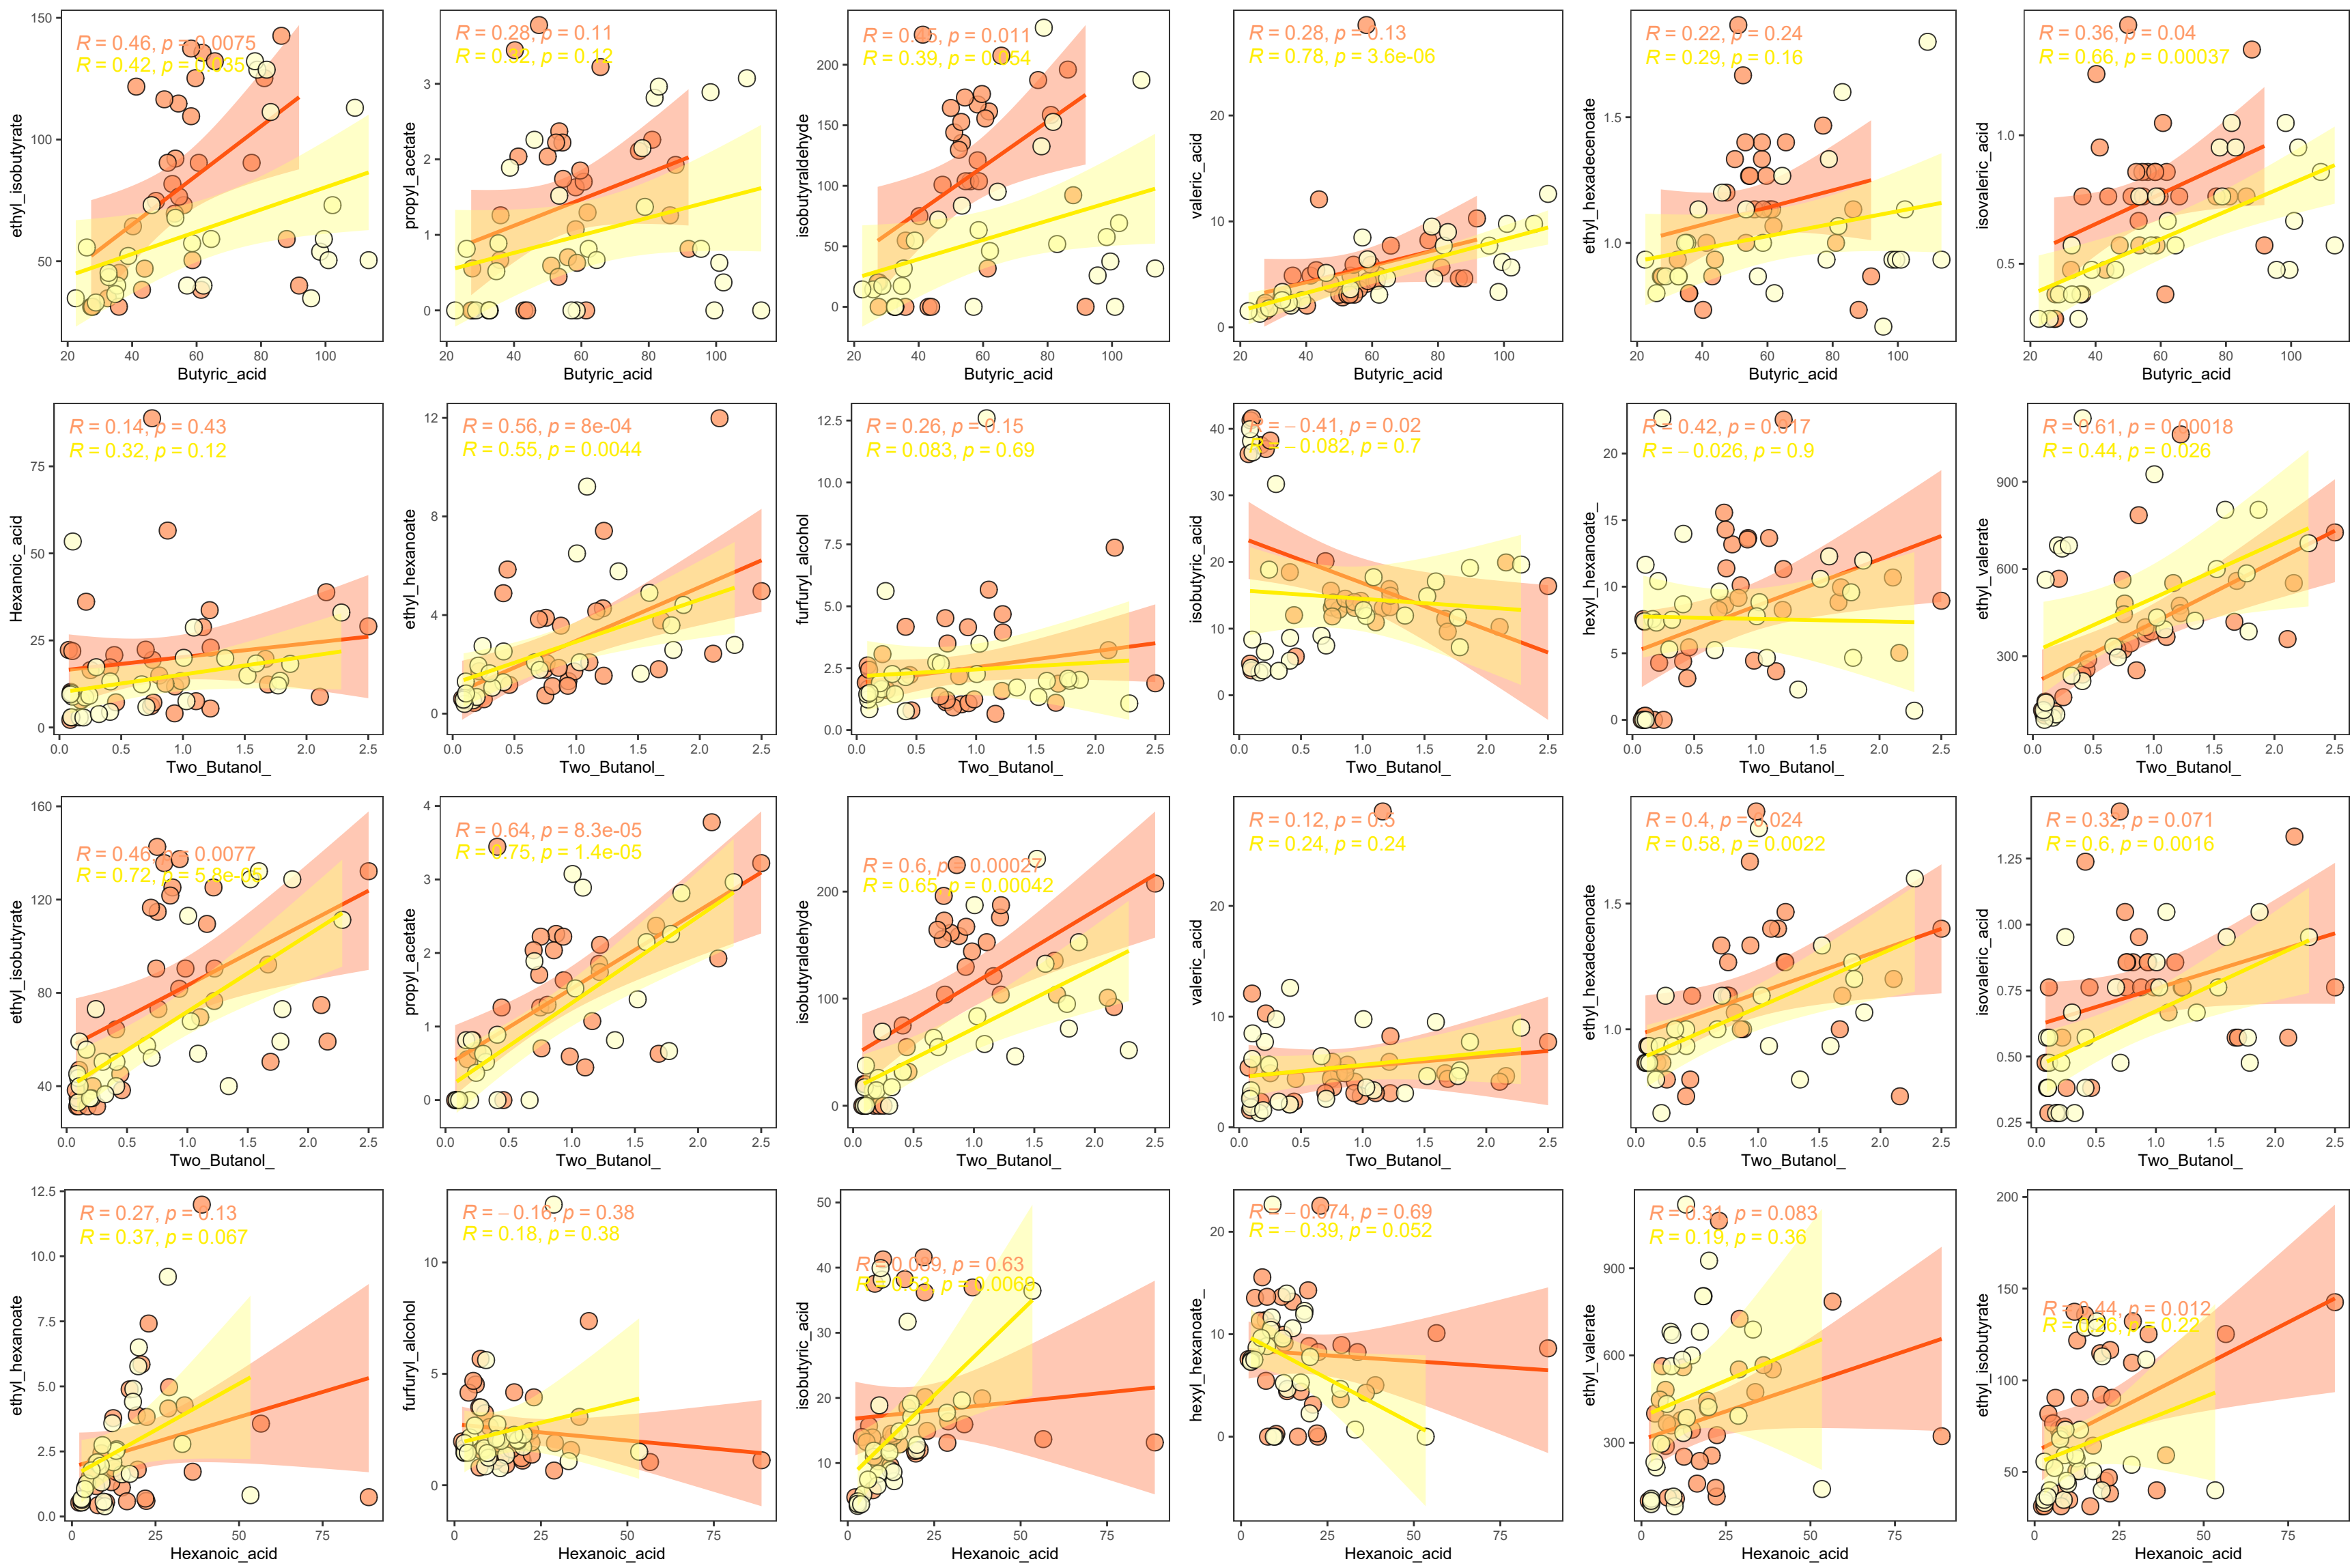



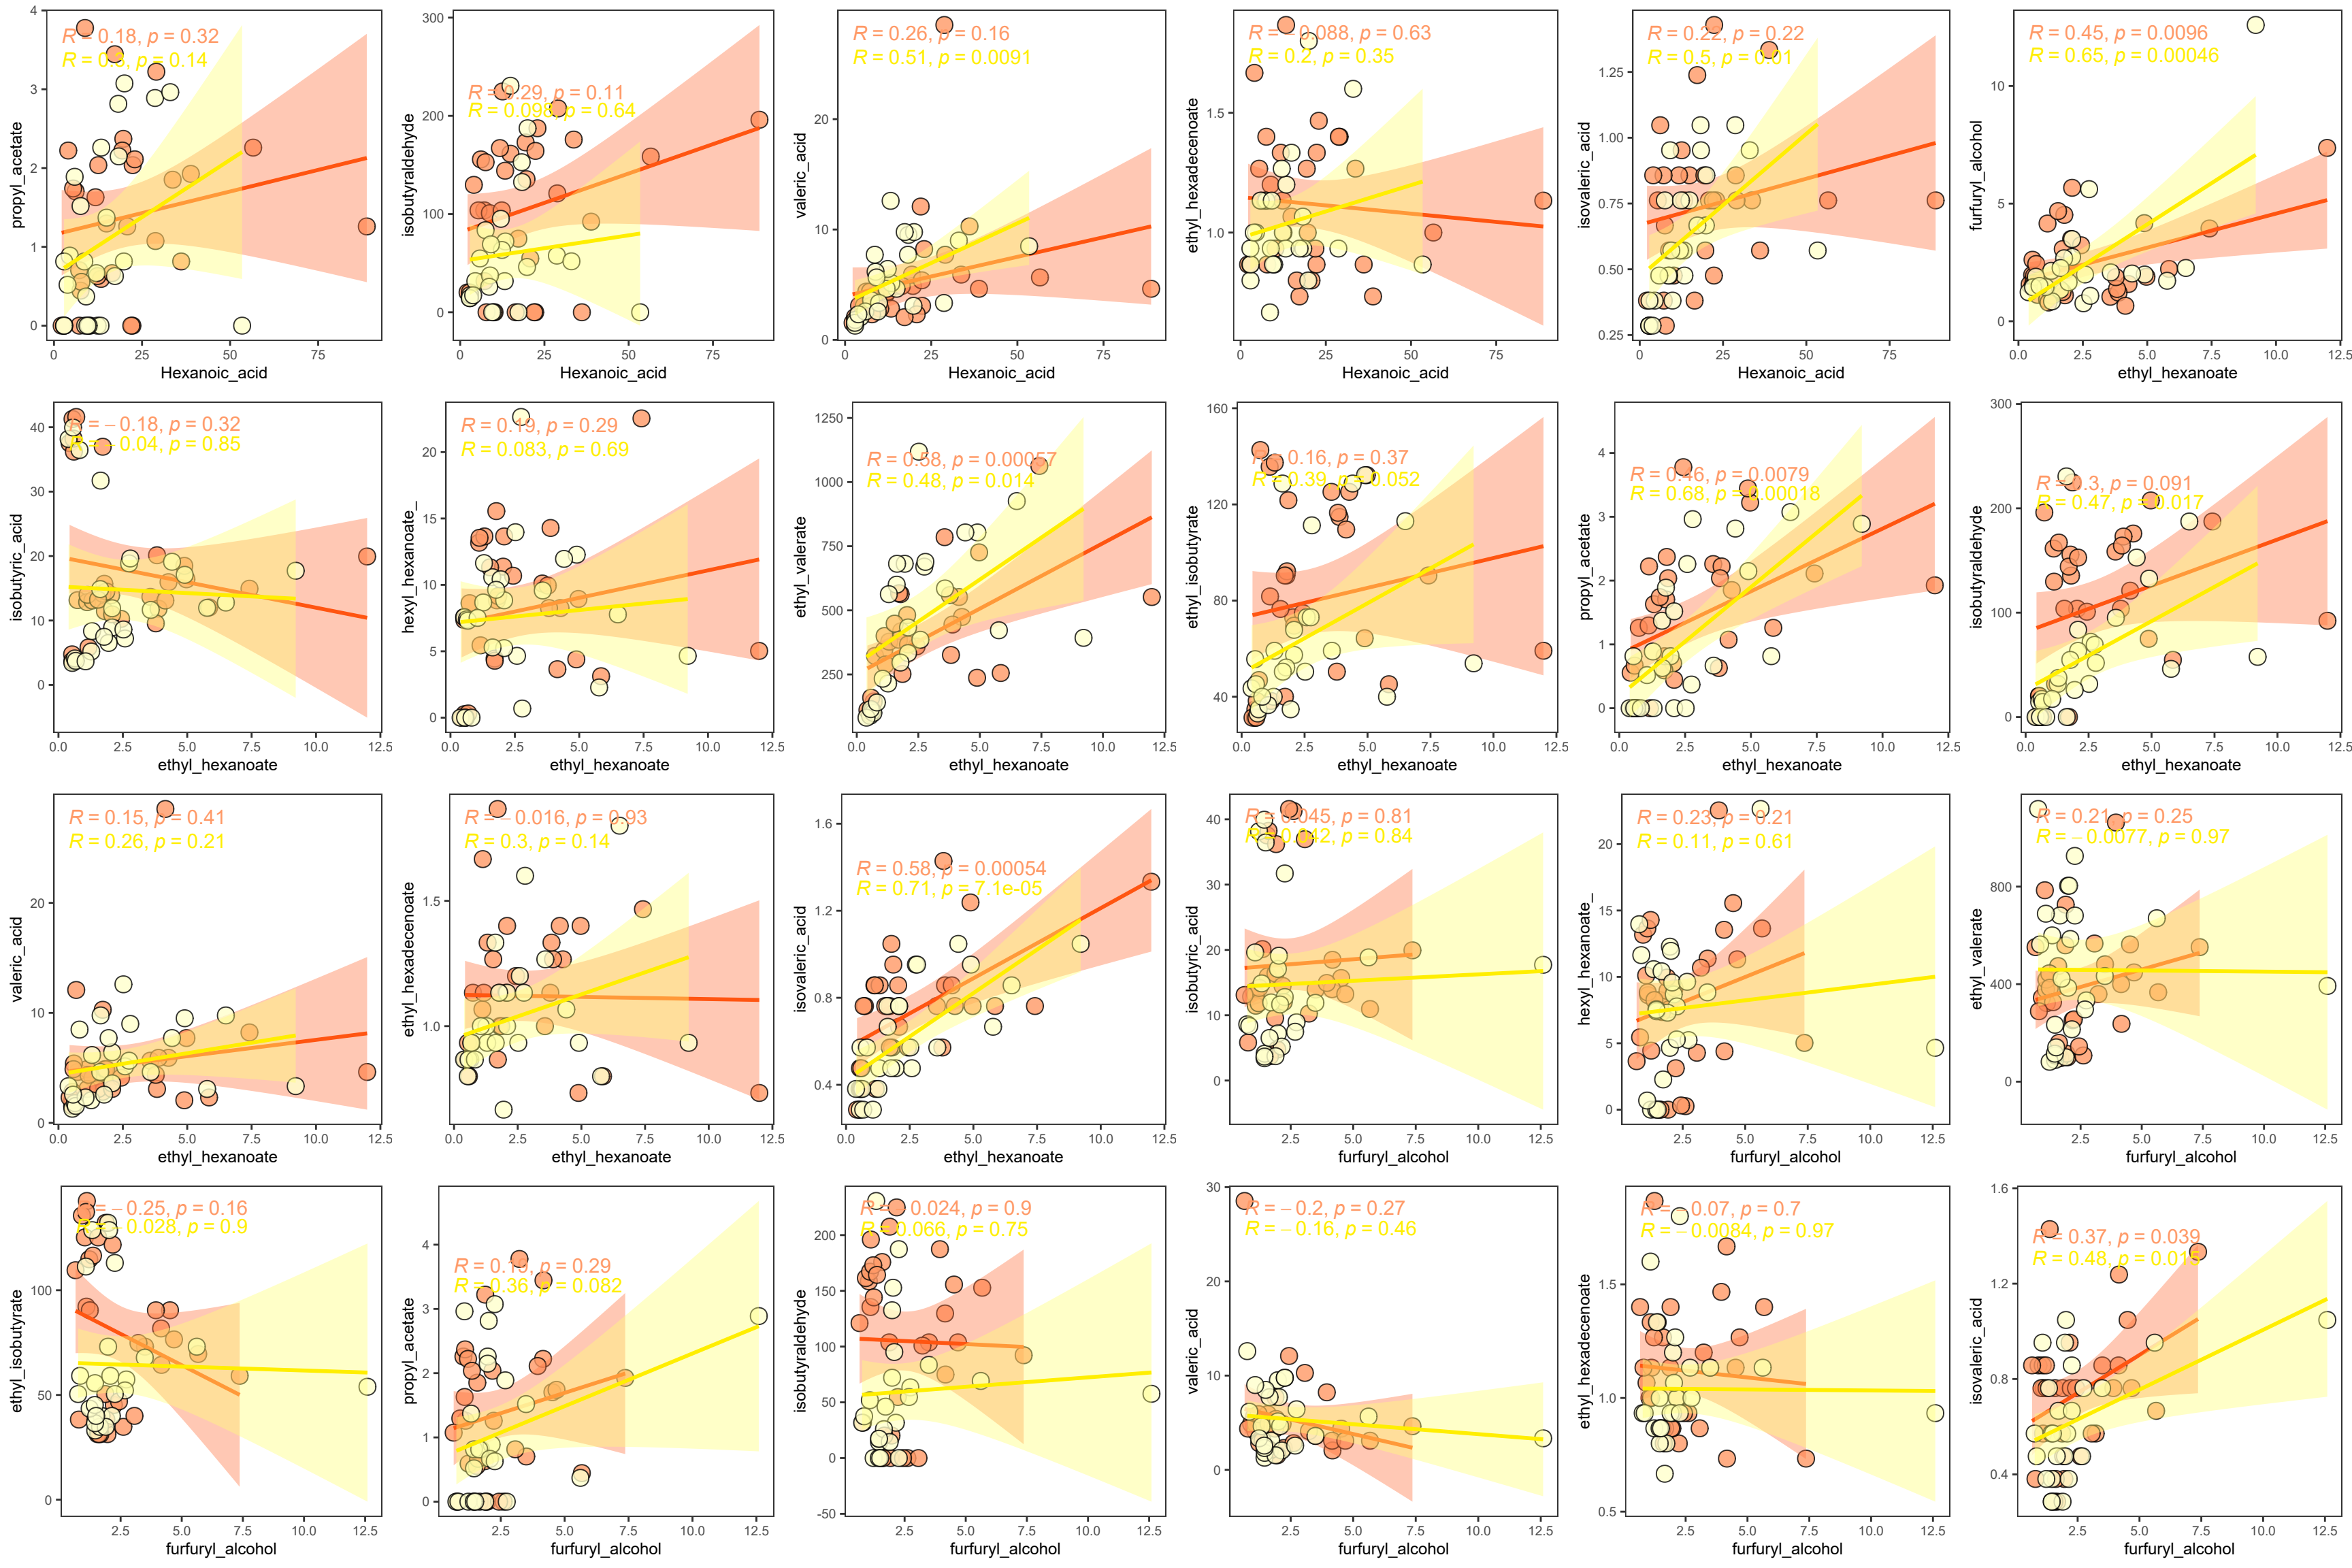

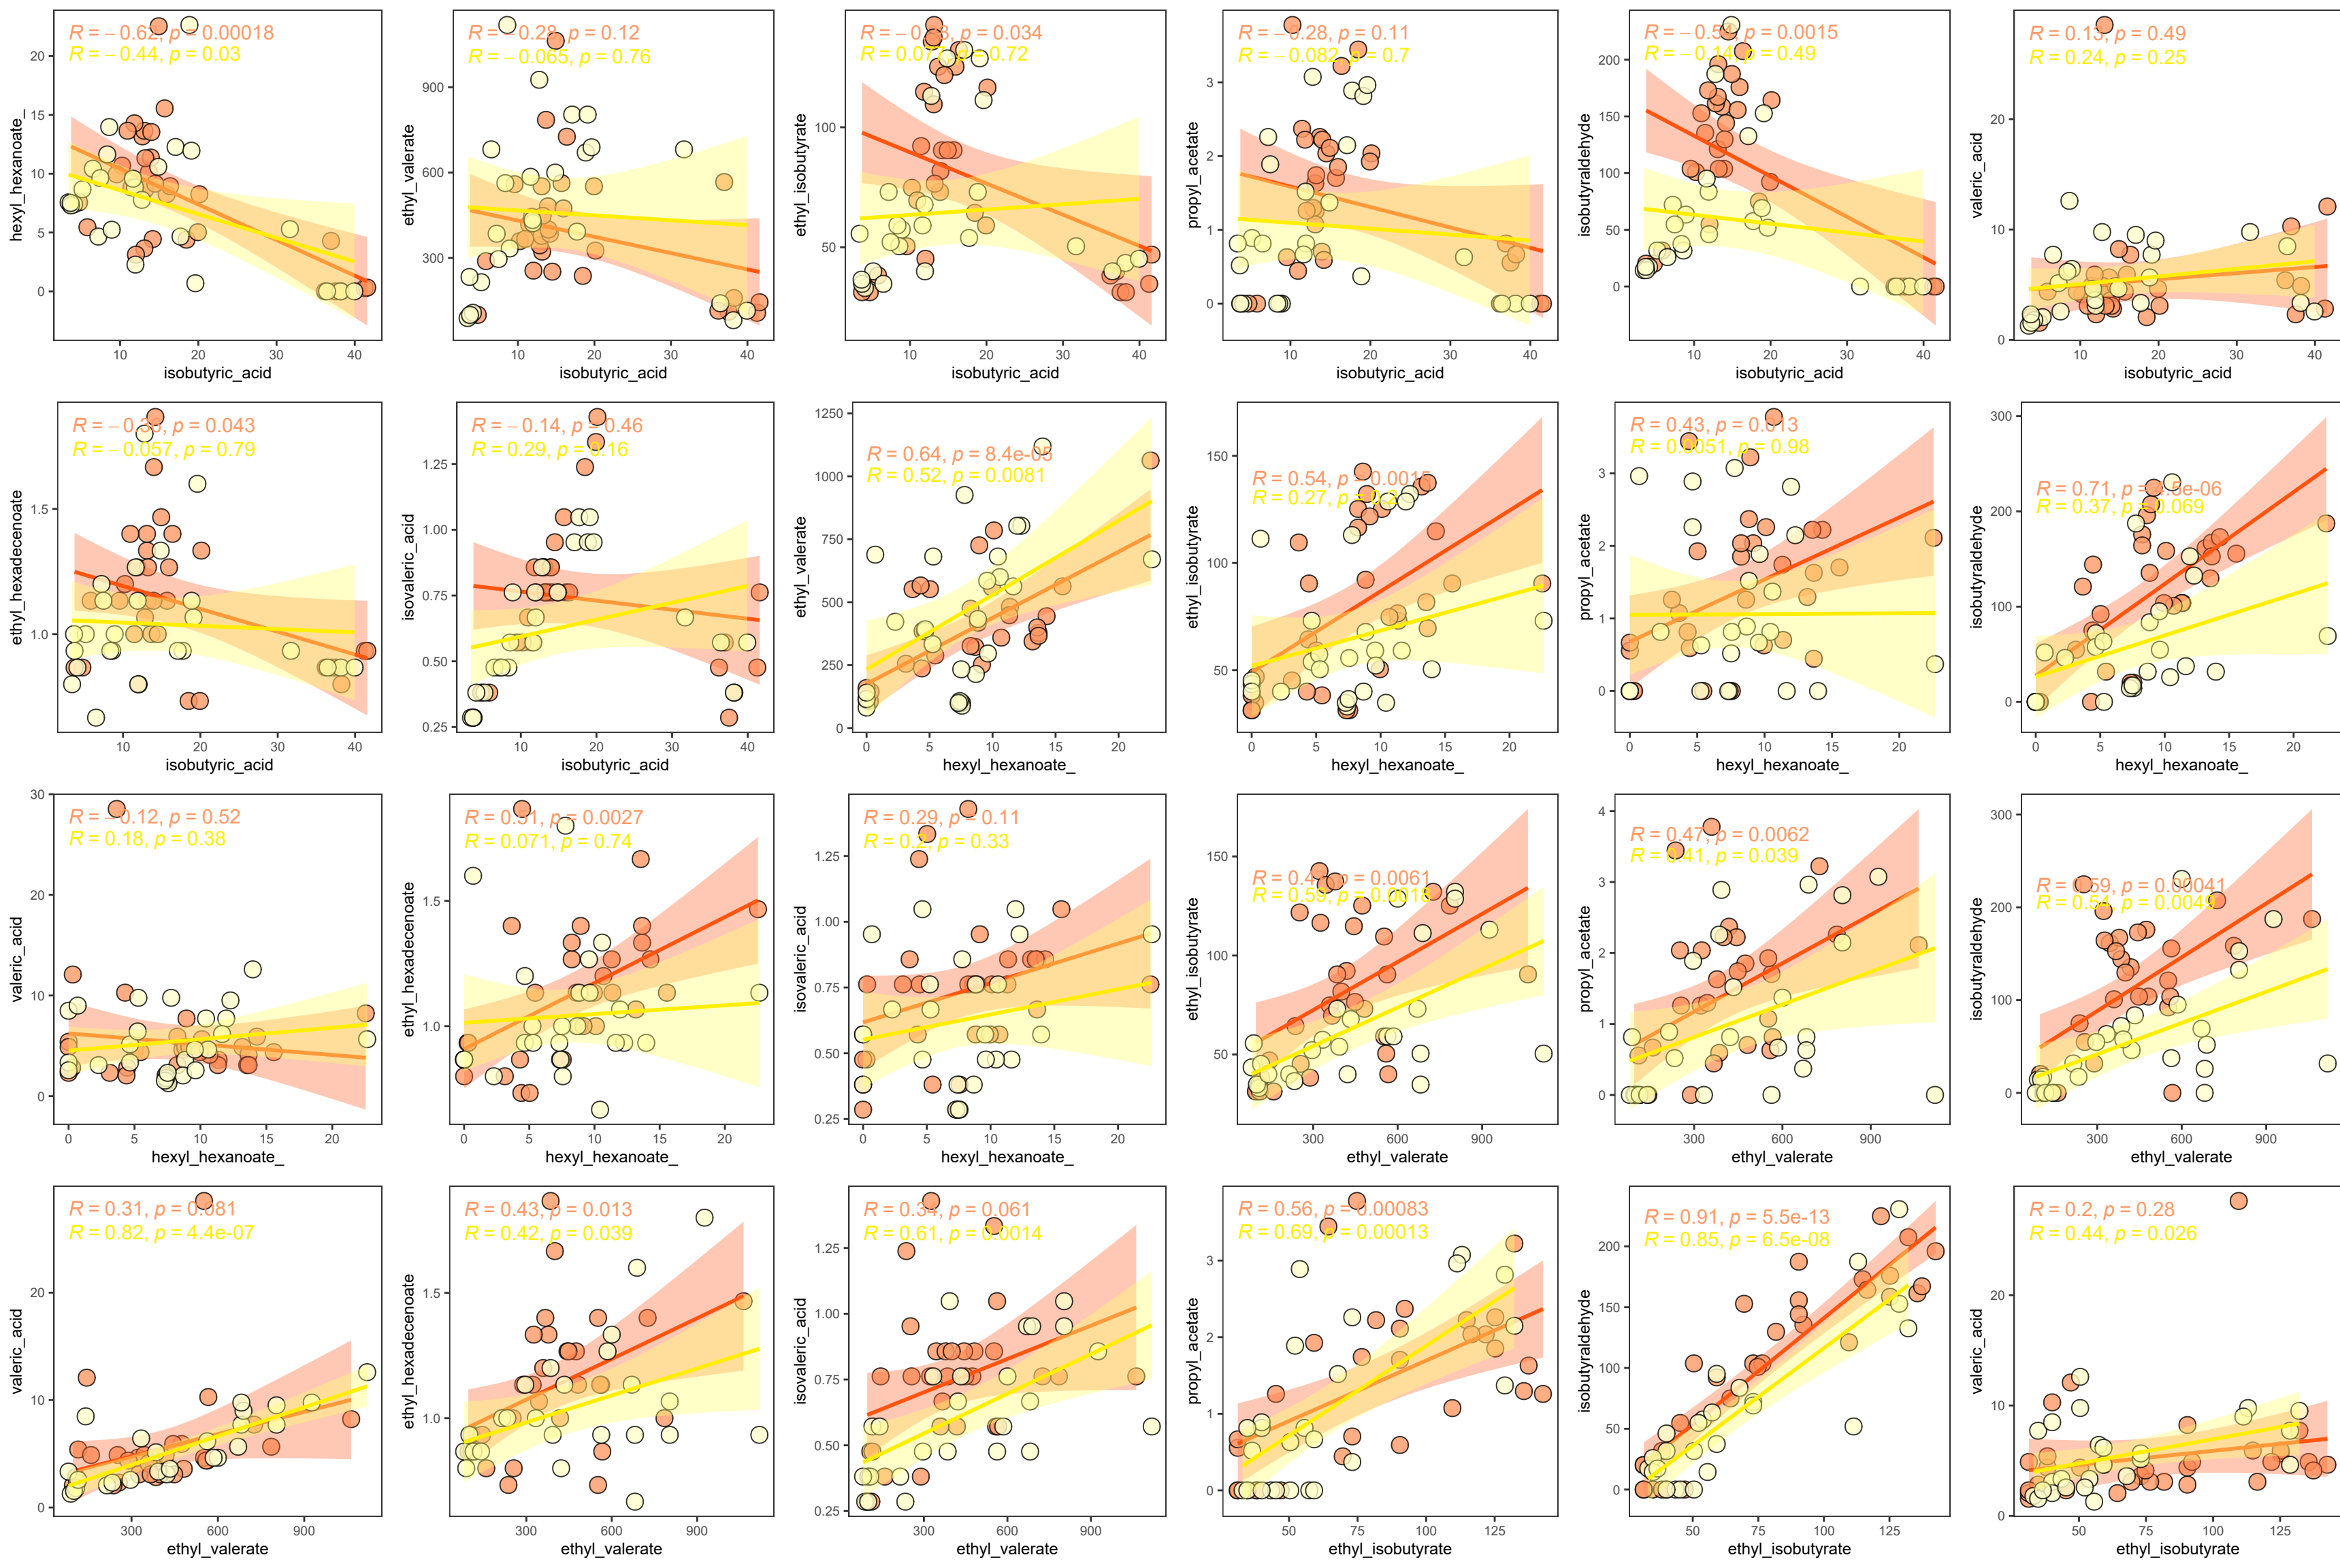



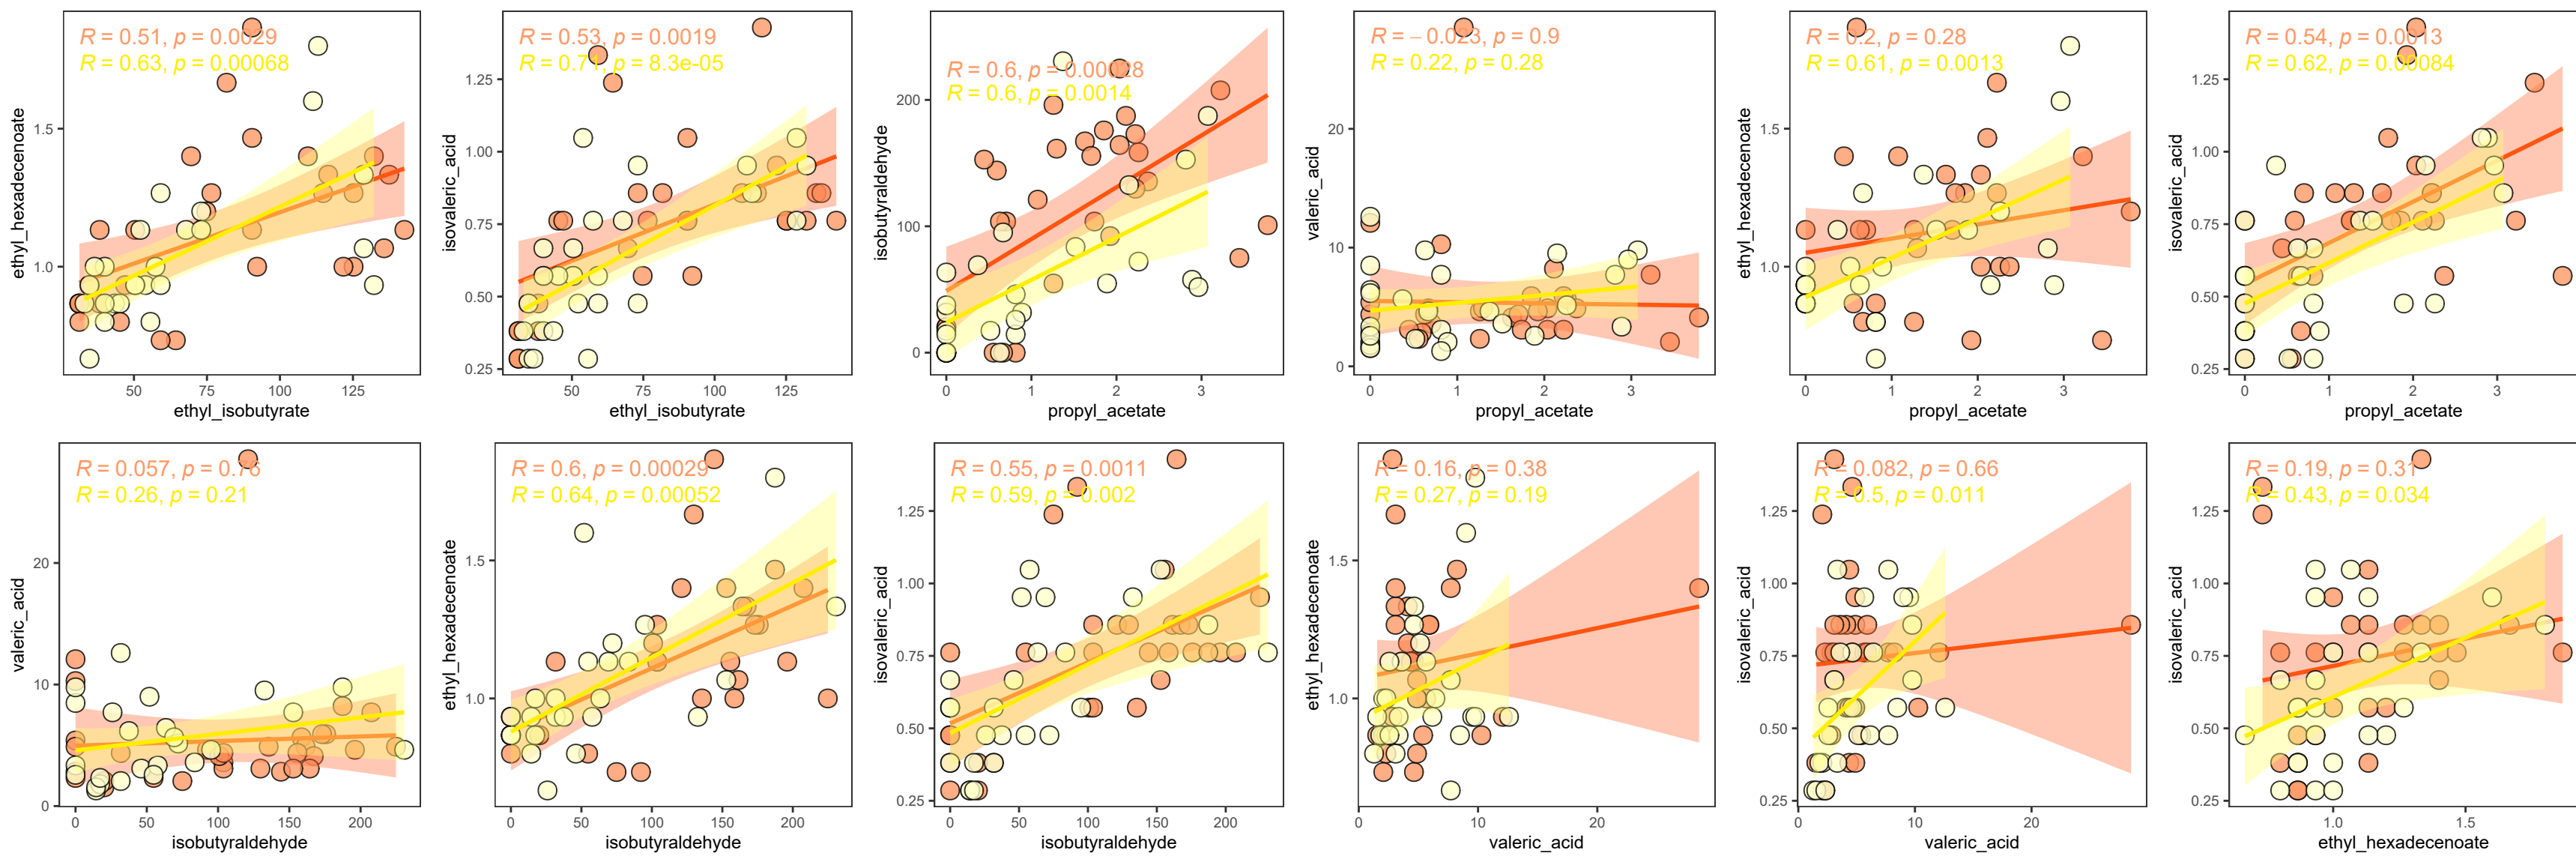

Supplement: s1 [file s1]
